1 Identification of bridgin, an unconventional linker, connects the outer  
2 kinetochore to centromeric chromatin

3

4 Shreyas Sridhar<sup>1</sup>, Tetsuya Hori<sup>2</sup>, Reiko Nakagawa<sup>3</sup>, Tatsuo Fukagawa<sup>2</sup> and Kaustuv  
5 Sanyal<sup>1\*</sup>

6

7

8 <sup>1</sup> Molecular Mycology Laboratory, Molecular Biology and Genetics Unit, Jawaharlal Nehru Center  
9 for Advanced Scientific Research, Bangalore, India-560064.

10 <sup>2</sup> Graduate School of Frontier Biosciences, Osaka University, Suita, Osaka 565-0871, Japan.

11 <sup>3</sup> Laboratory for Phyloinformatics, RIKEN Center for Biosystems Dynamics Research (BDR),  
12 Kobe, Japan.

13

14 \*Corresponding author

15 E-mail: [sanyal@jncasr.ac.in](mailto:sanyal@jncasr.ac.in)

1 **ABSTRACT**

2 The microtubule-binding outer kinetochore is linked to centromeric chromatin through the inner  
3 kinetochore CENP-C<sup>Mif2</sup>, CENP-T<sup>Cnn1</sup>, and CENP-U<sup>Ame1</sup> pathways. These are the only known  
4 kinetochore linker proteins across eukaryotes. Linker proteins are structurally less conserved than  
5 their outer kinetochore counterparts. Here, we demonstrate the recurrent loss of most inner  
6 kinetochore CCAN, including certain linker proteins during evolution in the fungal phylum of  
7 Basidiomycota. By studying the kinetochore interactome, a previously undescribed linker protein,  
8 bridgin was identified in the basidiomycete *Cryptococcus neoformans*, a human fungal pathogen. *In*  
9 *vivo* and *in vitro* functional analyses of bridgin reveal that it binds to the outer kinetochore and  
10 centromere chromatin simultaneously to ensure accurate kinetochore-microtubule attachments.  
11 Unlike known linker proteins, bridgin is recruited by the outer kinetochore. Homologs of bridgin were  
12 identified outside fungi. These results showcase a divergent strategy, with a more ancient origin than  
13 fungi, to link the outer kinetochore to centromeric chromatin.

14

15

16

17

18

19

20

21

22

23

24

25

1 Accurate chromosome segregation ensures faithful transmission of the genetic material to the  
2 progeny. The kinetochore is a multi-complex protein network that assembles on the centromere of  
3 each chromosome<sup>1-4</sup> and is attached to the spindle microtubules for accurate chromosome  
4 segregation<sup>5</sup>. Components involved in error correction mechanisms and the spindle assembly  
5 checkpoint (SAC) are recruited at kinetochores to ensure bi-orientation of sister chromatids in  
6 mitosis<sup>6-9</sup>. The inner kinetochore is composed of CENP-A<sup>10-12</sup> (centromeric Histone H3 variant) and  
7 the 16-member (in vertebrates) constitutive centromere associated network (CCAN)<sup>13-16</sup>. The outer  
8 kinetochore members of the KMN (KNL1, Mis12, and Ndc80 complexes) network<sup>1,17</sup> are recruited to  
9 CCAN to form the kinetochore ensemble in various model systems including budding yeast and  
10 vertebrate cells<sup>18</sup>. Additional components such as the three-member Ska1 complex in vertebrates  
11 and the 10-member Dam1 complex (Dam1C) in fungi localize to the outer kinetochore to ensure  
12 accurate kinetochore-microtubule interactions<sup>19-24</sup>.

13 The Ndc80 complex (Ndc80C) of the KMN network directly binds to spindle microtubules<sup>25-27</sup>. CCAN  
14 proteins, CENP-C<sup>Mif2</sup>, and CENP-T<sup>Cnn1</sup> have been shown to bridge centromeric chromatin with the  
15 KMN network independently<sup>28-32</sup>. Additionally, CENP-U<sup>Ame1</sup> functions as a linker in budding yeast<sup>33,34</sup>.  
16 CENP-C<sup>Mif2</sup> and CENP-T<sup>Cnn1</sup>, through their amino-termini (N), interact with the Mis12 complex  
17 (Mis12C) and the Ndc80C respectively, while their carboxy(C)-termini interact with centromeric  
18 chromatin<sup>35-37</sup>. An extended unstructured region separates the N and C termini in both CENP-C<sup>Mif2</sup>  
19 and CENP-T<sup>Cnn1</sup>. CENP-U<sup>Ame1</sup> also binds to Mis12C and CENP-A<sup>Cse4</sup> simultaneously to ensure a  
20 linker function in budding yeast<sup>33,34</sup>. Although these linker pathways are essential for accurate  
21 chromosome segregation, their architectural dependence varies across species<sup>29,30,32</sup>.

22 With the availability of genome sequencing data of a large number of organisms and improved  
23 bioinformatic tools, it has become evident that the KMN network components are highly conserved  
24 across eukaryotes<sup>38,39</sup>. Further, organisms with varying kinetochore compositions have been  
25 described, and such variations predominantly emerge due to alterations in the inner kinetochore  
26 composition<sup>22,40-42</sup>. The three critical kinetochore linker proteins CENP-C<sup>Mif2</sup>, CENP-T<sup>Cnn1</sup>, and CENP-  
27 U<sup>Ame1</sup>, are often lost or significantly diverged during evolution. In spite of the observed loss or  
28 significant divergence of the protein sequence, other molecular innovations of proteins to link  
29 centromeric chromatin to the outer kinetochore, ensuring accurate kinetochore-microtubule  
30 interactions remain largely unknown<sup>22,40,43</sup>.

1 Here, by analyzing a number of sequenced fungal genomes, we reveal that while retaining CENP-  
2 C<sup>Mif2</sup>, other CCAN components including conventional linker proteins CENP-T<sup>Cnn1</sup> and CENP-U<sup>Ame1</sup>  
3 homologs are lost multiple independent times in basidiomycetes. Furthermore, we identified a group  
4 of basidiomycete kinetochore proteins (Bkts) using *Cryptococcus neoformans*, a basidiomycete and  
5 human fungal pathogen, which undergoes a step-wise kinetochore assembly on a long repetitive  
6 regional centromere<sup>44–47</sup> as a model system. Based on the further functional analysis performed *in*  
7 *vivo* and *in vitro*, we demonstrate that a novel protein bridgin<sup>Bkt1</sup> connects the outer kinetochore to  
8 centromeric chromatin following its recruitment by KMN network proteins. Although being identified in  
9 a fungus, we predict the existence of bridgin homologs outside the fungal kingdom. These findings  
10 provide evidence of an unconventional kinetochore linker pathway, carried out by a novel class of  
11 kinetochore proteins found across eukaryotes.

## 12 RESULTS

### 13 Multiple independent loss events of CCAN proteins in Basidiomycota

14 To have a comprehensive understanding of the kinetochore composition in the fungal phyla of  
15 Basidiomycota, we analyzed putative kinetochore homologs using high confidence protein homology  
16 searches combined with secondary and tertiary structure prediction amongst species representing 31  
17 fungal orders across the three sub-phyla (Pucciniomycotina, Ustilagomycotina, and Agaricomycotina).  
18 Additionally, representative species across 7 fungal phyla were considered. CENP-A<sup>Cse4</sup>, the 16-  
19 member CCAN, and the 10-member KMN network were chosen for this study (Fig 1a and  
20 Supplementary Table 1). Our analysis indicates robust conservation of the KMN network proteins  
21 across basidiomycetes, which is consistent with previous studies<sup>39,42</sup>.

22 On the other hand, we observed that most CCAN proteins were recurrently lost across 23  
23 basidiomycete orders (Fig 1a). In the sub-phylum of Agaricomycotina, which *C. neoformans* belongs  
24 to, the loss event may have occurred early at the time of divergence of Wallemiales from other orders.  
25 While in the sub-phyla of Pucciniomycotina and Ustilagomycotina, the loss of most CCAN subunits  
26 might have taken place on multiple independent occasions, as suggested by retention of these  
27 proteins in a few discrete orders (Fig 1a). The inner kinetochore linker protein CENP-C<sup>Mif2</sup> was the  
28 only uniformly conserved CCAN component present across basidiomycetes. Other known linker  
29 proteins, CENP-T<sup>Cnn1</sup> and CENP-U<sup>Ame1</sup>, were often lost together. Although the primary protein

1 sequence conservation is low among CENP-T<sup>Cnn1</sup> homologs, they share a typical protein architecture,  
2 an N-terminal  $\alpha$ -helix composed of conserved hydrophobic residues and the CENP-T<sup>Cnn1</sup> motif at the  
3 C-terminal (Fig 1b). In the order Ustilaginales, a PITH domain spans the N-terminal of the CENP-T<sup>Cnn1</sup>  
4 homolog consisting of an  $\alpha$ -helix composed of conserved hydrophobic residues (Fig 1b). Thus, the  
5 CENP-C<sup>Mif2</sup> linker pathway is the single known linker pathway among 23 of the 32 basidiomycete  
6 orders investigated. These observations suggest a recurrent loss of most CCAN proteins in  
7 Basidiomycota.

### 8 **Interactome of kinetochore components validates our prediction of the kinetochore** 9 **composition in *C. neoformans***

10 We sought to validate our prediction of the kinetochore composition using a relatively well-studied  
11 basidiomycete yeast *C. neoformans*. In order to comprehensively determine the constitution of the  
12 kinetochore and its interactome *in vivo* we generated strains in which the endogenous genes of  
13 CENP-C<sup>Mif2</sup>, Dsn1 (Mis12C) and Spc25 (Ndc80C) were replaced with a C-terminus 3xFLAG tagged  
14 version and confirmed their functionality in the haploid *C. neoformans* type-strain background of H99 $\alpha$   
15 (Supplementary Fig. 1a-c). Mass spectrometry (MS) analyses was performed after FLAG  
16 immunoprecipitation (IP) of CENP-C<sup>Mif2</sup>, Dsn1, and Spc25 from metaphase enriched cell population,  
17 mitotic index >90% (Fig. 1c and Supplementary Table 2). All predicted inner kinetochore (CENP-A<sup>Cse4</sup>  
18 and the CCAN component CENP-C<sup>Mif2</sup>) and outer kinetochore KMN network components were  
19 identified from each of the three FLAG purifications (Fig. 1d). Identified KMN network components  
20 included previously unannotated ORFs coding for proteins of the Mis12C (CNAG\_04300<sup>NSL1</sup>,  
21 CNAG\_04479<sup>NNF1</sup>) and the KNL1C (CNAG\_03715<sup>SOS7</sup>) (Fig. 1d and Supplementary Table 2). Except  
22 for CENP-C<sup>Mif2</sup>, no components of the CCAN were identified (Fig. 1d, and Supplementary Table. 2).  
23 This result further validates that *C. neoformans* retains a single known kinetochore linker pathway  
24 through CENP-C<sup>Mif2</sup> while having lost other known linker pathways, mediated by the CENP-T<sup>Cnn1</sup> and  
25 CENP-U<sup>Ame1</sup> complexes.

### 26 **A novel basidiomycete kinetochore protein (Bkt), Bridgin (Bgi1) is identified**

27 We next investigated whether there existed unknown kinetochore proteins compensating for the loss  
28 of CCAN subunits in *C. neoformans*. Having identified all known structural kinetochore components  
29 from each IP-MS experiment, we hypothesized that it was possible to identify novel kinetochore

1 proteins from the common list of interactors from CENP-C<sup>Mif2</sup>, Dsn1 and Spc25 affinity purification  
2 experiments (Fig. 1e). With this criteria we categorized two sets of proteins: a) primarily conserved  
3 amongst basidiomycetes with unknown function, and named them basidiomycete kinetochore  
4 proteins (Bkts) (CNAG\_01903<sup>Bkt1</sup>, CNAG\_03959<sup>Bkt2</sup> and CNAG\_02701<sup>Bkt3</sup>) (Supplementary Fig. 1d),  
5 and b) known chromatin interacting proteins with uncharacterized kinetochore function  
6 (CNAG\_01340<sup>Yta7</sup> and all components of the Mcm complex [Mcm2-7]) (Supplementary Fig. 1e). We  
7 used CNAG\_03962<sup>Mcm6</sup> as a representative test candidate. In the secondary screen, these five  
8 proteins were epitope-tagged at the native locus each with a C-terminus V5-GFP in a strain  
9 expressing mCherry-tagged inner kinetochore proteins, CENP-A<sup>Cse4</sup> or CENP-C<sup>Mif2</sup>. CNAG\_03715<sup>SOS7</sup>  
10 was used as a candidate to validate the localization of identified unannotated kinetochore proteins  
11 (Fig. 1f and Supplementary Fig. 1f). Among the five proteins, strains where subcellular localization  
12 could be observed, was obtained for four, excluding CNAG\_02701<sup>Bkt3</sup>. The protein encoded by the  
13 ORF.CNAG\_01903<sup>BKT1</sup> colocalized at specific cell cycle stages with the inner kinetochore protein,  
14 CENP-C<sup>Mif2</sup> (Fig. 1f and Supplementary Fig. 1g). Other proteins did not show exclusive kinetochore  
15 localization, although some puncta of Yta7 and Mcm6 co-localized transiently with the inner  
16 kinetochore marker at G1/S stage of the cell cycle (Supplementary Fig. 1g). Based on the localization  
17 analysis of the protein hits, CNAG\_01903<sup>Bkt1</sup> was taken forward as a candidate kinetochore protein.  
18 Considering its identified function through this study, we refer to Bkt1 as bridgin (Bgi1) henceforth.

## 19 **Bridgin is recruited via multiple outer kinetochore receptors and its kinetochore level peaks at** 20 **anaphase**

21 Bridgin localized at the centromere in an M phase enriched cell population (Fig. 2a and  
22 Supplementary Fig. 1h). We subsequently investigated where bridgin localizes at the kinetochores in  
23 the kinetochore localization hierarchy. Our previous study suggested a step-wise assembly of the  
24 kinetochore, yet no sequential assembly of kinetochore sub-complexes was established in *C.*  
25 *neoformans*<sup>44</sup>. Using a microscopy-based interdependency analysis (Fig. 2b), we determined that the  
26 Mis12C and Ndc80C influence the stability of each other at the kinetochore (Supplementary Fig. 2b  
27 and c). The Dam1C (Supplementary Fig. 2h and i) and KNL1C (Supplementary Fig. 2d and e)  
28 independently require the Mis12C-Ndc80C platform for kinetochore recruitment. While the Ndc80C-  
29 Mis12C platform needed the inner kinetochore protein CENP-C<sup>Mif2</sup> for its localization (Supplementary

1 Fig. 2a). Performed interdependencies are tabulated (Supplementary Fig. 2k) and summarized in  
2 Supplementary Fig. 2l.

3 Subsequent interdependency analyses suggested that bridgin localizes to the kinetochore  
4 independent of Dad2 (Dam1C) (Fig. 2c). On the other hand, bridgin localization at the kinetochore  
5 wholly and partially (~65%) depends on Mis12<sup>Mtw1</sup> (Mis12C) (Fig. 2d) and Sos7 (KNL1C) (Fig. 2e),  
6 respectively. Further, bridgin's kinetochore localization is independent of spindle integrity (Fig. 2f).  
7 The recruitment of bridgin downstream of the KNL1C and Mis12C-Ndc80C platform suggests that  
8 there may exist multiple binding sites for bridgin onto the KMN network (Fig. 2g).

9 To understand how bridgin dynamics is regulated during cell cycle progression, we analyzed bridgin  
10 signal intensities at the kinetochore. Bridgin localized to the kinetochore starting from G2 until  
11 telophase/G1 (Fig. 2h-k and Supplementary Fig. 1j). The signal intensities of bridgin at the  
12 kinetochore reached a peak immediately at the onset of anaphase, attaining an average ~150% of  
13 metaphase intensities (Fig. 2i, k and l, and Supplementary Fig. 1j). The dynamic intensities of other  
14 transiently localized kinetochore proteins of the KMN network, Mis12<sup>Mtw1</sup>, Nuf2, and Knl1<sup>Spc105</sup>, and the  
15 subunits of the Dam1C, Dad1, and Dad2, were measured. The KMN network proteins localized  
16 concomitantly to the kinetochore during G2 and persisted until telophase/G1, reaching the maximum  
17 signal intensity during metaphase (Fig. 2l and Supplementary Fig. 1i). The Dam1C proteins Dad1 and  
18 Dad2 localized post-mitotic onset exclusively, reaching peak intensities at metaphase and reducing  
19 sharply, almost to an undetectable level in late anaphase (Fig. 2l and Supplementary Fig. 1i). Analysis  
20 of bridgin localization in an asynchronous population further validated the cell cycle-stage specific  
21 kinetochore localization, similar to the outer kinetochore protein Mis12<sup>Mtw1</sup> (Fig. 2m). Yet, KMN  
22 network proteins and bridgin reached peak kinetochore intensities at distinct times, metaphase and  
23 anaphase, respectively (Fig. 2l).

24 Enrichment at the kinetochore, dependence on outer kinetochore KMN network proteins and spindle  
25 independent kinetochore localization of bridgin strongly implicate that bridgin is an outer kinetochore  
26 protein. Further, taking into consideration the interdependency with the outer kinetochore proteins and  
27 the localization dynamics, we propose that bridgin localizes onto the KMN platform at the kinetochore.

28 **Bridgin is essential for accurate kinetochore-microtubule interaction**

1 Bridgin-null (*bgi1Δ*) strains were generated to characterize the function of bridgin as a kinetochore  
2 protein. *bgi1Δ* cells exhibited reduced growth rates (Fig. 3a), and ~20% loss in viability  
3 (Supplementary Fig. 3a). These mutant cells also displayed a ~90-fold increase in the gross  
4 missegregation rate, which may account for the reduced viability in *bgi1Δ* (Fig. 3b and Supplementary  
5 Fig. 3b). *bgi1Δ* defects were complemented by the reintegration of the full-length bridgin gene (*Bgi1<sup>FL</sup>*)  
6 expressed under its native promoter (Fig. 3b and Supplementary Fig. 3a). We subsequently examined  
7 how *bgi1Δ* affected cell cycle progression. For this, microscopic markers to determine cell cycle  
8 stages previously determined<sup>44,48</sup> were used and summarized in Supplementary Fig. 3c. While WT  
9 cells spent an average of 18 min in M phase, *bgi1Δ* cells showed a delay in M phase for ~30min (an  
10 under-representation since ~10% of cells failed to exit M phase arrest even after >50 min)  
11 (Supplementary Fig. 3d). Within the M phase, the delay occurred prior to anaphase onset (Fig. 3c and  
12 Supplementary Fig. 4f). *bgi1Δ*, when examined by live-cell microscopy, exhibited unattached  
13 chromosomes, lagging chromosomes, and micronuclei formation defects, suggesting that inaccurate  
14 kinetochore-microtubule attachments occurred (Fig. 3d-f and Supplementary Fig. 3f). *mad2Δ* in the  
15 background of *bgi1Δ* alleviated M phase delay (Fig. 3c and Supplementary Fig. 3f), but the double  
16 mutants were conditionally synthetic lethal upon treatment of the microtubule poison thiabendazole (2  
17 μg/ml) or under conditions of spindle insult (14°C and 37°C) (Fig. 3g). Based on these observations,  
18 we conclude that bridgin is essential for accurate kinetochore-microtubule interactions. Absence of  
19 bridgin in cells (*bgi1Δ*) elicit a prolonged SAC response in its absence, to correct for erroneously  
20 kinetochore-microtubule attachments.

## 21 **Basic domain of bridgin is dispensable for kinetochore localization but critical for its function**

22 We next sought to understand how bridgin carries out its role at the kinetochore. Bridgin has 1295-  
23 amino acid (aa), in which aa1-124 forms a fork-head associated (FHA) domain (a phosphopeptide  
24 recognition domain), aa161-164 creates an unconventional putative PP1 docking site, while the  
25 remaining region of the protein is predicted to be largely unstructured (Fig. 4a). The aa1005-1295 C-  
26 terminal region is predicted to have a pI of 11.20, and we refer to this region as the basic domain  
27 (BD). The unstructured domain (USD) was defined as the region spanning aa125-1004, which was  
28 acidic with a pI of 4.65 (Fig. 4a) and contained 13 repeats of a bridgin consensus motif  
29 (Supplementary Fig. 4a and Supplementary Table 3). Domain deletion constructs were generated as  
30 described in Supplementary Fig. 4b, wherein the domain deletion is expressed under its native



1 promoter with an N-terminus 3xFLAG-GFP epitope tag. The cassettes were reintegrated into *bgi1Δ*  
2 cells expressing H4-mCherry (Supplementary Fig. 4b) to obtain strains expressing truncated bridgin  
3 proteins lacking various domains, as mentioned in Fig. 4b. Microscopic estimation of GFP signal  
4 intensities of the bridgin derivatives and the Bgi1<sup>FL</sup> suggested that the FHA domain (FD) and USD  
5 regions were able to localize independently of each other at the kinetochore, albeit to different extents  
6 of ~20% and ~40% of the WT level respectively (Fig. 4c and d). Localization of Bgi1<sup>BDΔ</sup> at the  
7 kinetochore was not significantly different from that of WT (Fig. 4c and d). Further, lack of kinetochore  
8 localization by the BD suggested it was not involved in kinetochore localization of bridgin. Localization  
9 analyses using various truncated mutants suggest that bridgin through its FD and USD can make  
10 multiple contacts at the kinetochore, consistent with the observation that bridgin is recruited  
11 downstream to multiple outer kinetochore KMN proteins (Fig. 2g).

12 Subsequently, to define the domains necessary for bridgin function, we scored for complementation of  
13 the *bgi1Δ* phenotype at 37°C ( used for ease of scoring due to enhancement in the population of M  
14 phase delayed cells) (Fig. 4e) and cell growth assays under conditions altering microtubule dynamics  
15 (Fig. 4f). Partial complementation of phenotype was observed for the Bgi1<sup>FDΔ</sup> mutant, exhibiting  
16 reduced kinetochore localization while retaining the BD. No significant complementation was obtained  
17 for any of the other domain deletion constructs including the Bgi1<sup>BDΔ</sup>, that localized to the kinetochore  
18 similar to Bgi1<sup>FL</sup> levels (Fig. 4e and f). Bgi1<sup>FL</sup> was able to suppress *bgi1Δ* phenotype significantly (Fig.  
19 4e and f). Comparable results were observed for the rate of missegregation events at 30°C  
20 (Supplementary Fig. 4c), albeit weak complementation was observed for Bgi1<sup>BDΔ</sup>. Taken together, all  
21 domains, including BD, which is not related to kinetochore localization of bridgin, are critical for the full  
22 function of bridgin.

### 23 **The C-terminal basic domain of bridgin interacts with DNA**

24 Impact of bridgin on SAC activity (Supplementary Fig. 4d and e), spindle dynamics (measured at its  
25 most dynamic stage, anaphase, Supplementary Fig. 4f) and gross kinetochore composition  
26 (Supplementary Fig. 4g-j) were tested and found to be unaltered in *bgi1Δ*. Thus these factors were  
27 ruled out as possible reasons of defective kinetochore-microtubule attachments associated with *bgi1Δ*  
28 mutants.

1 To address the role of BD towards bridgin function, FLAG affinity purification of Bgi1<sup>FL</sup> (using 150 mM  
2 KCl and a more stringent condition of 300 mM KCl) and Bgi1<sup>BDA</sup> (150 mM KCl) was performed and  
3 these samples were subject to mass spectrometry analysis (Fig. 5a, Supplementary Fig. 4k and  
4 Supplementary Table 4). A comparison of the relative abundance of specific interactors obtained  
5 within Bgi1<sup>FL</sup> and Bgi1<sup>BDA</sup> suggested an enrichment of chromatin interacting proteins in Bgi1<sup>FL</sup> affinity  
6 purification over Bgi1<sup>BDA</sup> (Fig. 5b *top*). While, kinetochore proteins were relatively more abundant as  
7 interactors in Bgi1<sup>BDA</sup> over Bgi1<sup>FL</sup> affinity purifications (Fig. 5b *bottom*), with proteins of the KMN  
8 network being the top hits (Fig. 5b and Supplementary Table 4).

9 Based on the observation that chromatin interacting proteins are more enriched in the Bgi1 construct  
10 containing the BD, Bgi1<sup>FL</sup>, we hypothesized that BD might interact with chromatin. Through co-  
11 immunoprecipitation experiments, histone H4 was found to associate with Bgi1<sup>FL</sup> (150 mM) and to a  
12 reduced extent with CENP-C<sup>Mif2</sup> (Fig. 5c). No detectable association of histone H4 was obtained with  
13 outer kinetochore proteins (Dsn1, Spc25, and Spc34) or Bgi1<sup>BDA</sup> (Fig. 5c). These results led us to  
14 hypothesize that bridgin-chromatin interaction occurs through Bgi1-BD and not a consequence of  
15 bridgin receptor assembly, KMN network, onto centromeric chromatin. We tested the possibility of  
16 interaction between bridgin BD with chromatin *in vitro* by EMSA and found that the BD binds to DNA  
17 (Fig. 5d) and nucleosomes of varying compositions (Supplementary Fig. 5a). Further, these  
18 observations indicated to us that the interaction between the BD and DNA/chromatin might be non-  
19 specific.

20 While we observed non-specific bridgin-chromatin interactions *in vitro*, we hypothesized that if  
21 additional regulators existed *in vivo* to restrict bridgin BD localization to centromeric chromatin, over-  
22 expression (OE) of bridgin would not alter its localization (Supplementary Fig. 5b). On the contrary,  
23 we observed that localization of Bgi1-OE was transformed and overlapped with chromatin marked by  
24 histone H4 (Fig. 5e and Supplementary Fig 5c), indicating that bridgin can interact with  
25 DNA/chromatin non-specifically *in vivo* as well. Microtubule-like signal or localization of Bgi1-OE  
26 outside chromatin, marked by H4, was not observed. Hence, we ruled out the possibility of the outer  
27 kinetochore protein bridgin in binding to microtubules. Further, we used the over-expression strategy  
28 as an assay to determine the DNA binding ability of bridgin domain deletion mutants *in vivo* (Fig. 5f).  
29 PCNA was used as a negative control, wherein nuclear-localized but chromatin unbound PCNA pool  
30 diffused into the cytoplasm during M phase, on account of semi-open mitosis. While Bgi1<sup>FL</sup>-OE

1 localization was observed to overlap with H4-mCherry, Bgi1<sup>BDA</sup>-OE was restricted to a punctum.  
2 Supporting the notion that bridgin localizes to the kinetochore through FD and USD, a punctum for  
3 both constructs, Bgi1<sup>FD</sup> and Bgi1<sup>USD</sup>, were observed. Further, the localization of Bgi1<sup>BD</sup> was found to  
4 be similar to Bgi1<sup>FL</sup>. Thus, these observations suggested that the BD was necessary and adequate to  
5 bind chromatin *in vivo*, and the loss of BD in the over-expression constructs was sufficient to restrict  
6 bridgin localization to the kinetochore puncta.

7 Considering bridgin was recruited to the outer kinetochore downstream of the KMN network, it was  
8 surprising that bridgin BD binds to chromatin. Further, increased enrichment of DNA from the Bgi1<sup>FL</sup>  
9 over Bgi1<sup>BDA</sup> in the native-ChIP suggested that bridgin, through its BD interacts with DNA when  
10 kinetochore localized (Supplementary Fig. 5d).

### 11 **Basic nature of bridgin BD is vital for its function**

12 We show that bridgin loss does not alter previously described chromatin marks of H3K9me2 and CpG  
13 methylation at *C. neoformans* centromeres (Supplementary Fig. 5 e and f), towards understanding the  
14 consequence of bridgin binding to DNA. To summarize our findings, we observe that bridgin localizes  
15 to the kinetochore through FD and USD, and its interaction with DNA/chromatin through its BD is  
16 essential for its function (Supplementary Fig. 6a). However, it is still unclear how BD influences  
17 bridgin's function. We hypothesize two possibilities: a) interaction of BD with other proteins at  
18 chromatin is essential for bridgin function or b) the ability of BD to interact with DNA is adequate for  
19 bridgin's function. To distinguish these possibilities, we performed a domain-swap experiment.

20 Replacing the BD<sup>1005-1295</sup> of bridgin with an amino acid stretch of similar properties (length: ~300aa.,  
21 unstructured, non-specific DNA binding and a charge of ~pl of 10) found in the basic region (BD)<sup>2937-  
22 3256</sup> of the human Ki67 gene (Fig. 6a). Ki67 was previously shown to bind non-specifically to DNA<sup>49</sup>  
23 and functions as a surfactant by coating chromosomes during mitosis<sup>50</sup>. We confirmed that Ki67  
24 BD<sup>2937-3256</sup> binds to DNA non-specifically in *C. neoformans* using the overexpression assay  
25 (Supplementary Fig. 6b). Bgi1<sup>FL</sup>, Bgi1<sup>BDA</sup>, and Bgi1<sup>BDA</sup>+Ki67<sup>BD</sup> were expressed under the native  
26 bridgin promoter as described for other domain deletion constructs and found to localize to the  
27 kinetochore with similar intensities when integrated into a *bgi1Δ* background strain (Fig. 6b and c).  
28 Weak complementation was observed for Bgi1<sup>BDA</sup> over *bgi1Δ* (Fig. 6d). On the other hand, the  
29 Bgi1<sup>BDA</sup>+Ki67<sup>BD</sup> construct was able to complement defects observed in *bgi1Δ* and the Bgi1<sup>BDA</sup>

1 mutants. The Bgi1<sup>BDΔ</sup>+Ki67<sup>BD</sup> phenotype was non-significant from the FL (Fig. 6d and Supplementary  
2 Fig. 6c). These observations were additionally validated by the spotting growth assay (Fig. 6e).

3 While we cannot rule entirely out the contribution of the amino and/or middle region of bridgin towards  
4 function, independent of its kinetochore localization capacity. We propose that bridgin ensures  
5 accurate kinetochore-microtubule attachments and mitotic fidelity by linking the outer kinetochore to  
6 centromeric chromatin, based on the ability of bridgin to simultaneously localize to the outer  
7 kinetochore through the KMN network and to bind to DNA (Fig. 6f).

## 8 **DISCUSSION**

9 As a step towards understanding the evolution of kinetochore organization and composition, we  
10 chose to study the kinetochore interactome of the human pathogen and a basidiomycete yeast *C.*  
11 *neoformans*. During the study, we identified a novel outer kinetochore protein, that we termed as  
12 bridgin in *C. neoformans*. Our experiments strongly indicate the absence of most known CCAN  
13 proteins, with the exception of CENP-C<sup>Mif2</sup>, and presence of all KMN network proteins in this system,  
14 validating our bioinformatic prediction. Thus, suggesting a single known linker pathway (CENP-C)  
15 from centromeric chromatin to the outer kinetochore, reminiscent of the fruit fly *D. melanogaster* and  
16 the nematode *C. elegans* like kinetochores<sup>39,51–54</sup>. However, we propose, and as the name suggests,  
17 that bridgin functions as a new linker protein, since it binds to the outer kinetochore and centromeric  
18 DNA simultaneously, analogous to previously described linker proteins CENP-C<sup>Mif2</sup><sup>33,55,56</sup> and CENP-  
19 T<sup>Cnn1</sup><sup>15,40,57</sup>. Presence of multiple kinetochore linker pathways is critical, to varying extents, in  
20 overcoming Dsn1 inhibition<sup>29,30,32</sup>. Unlike the single linker pathway containing kinetochore such as that  
21 of *D. melanogaster*<sup>52,58</sup>, *C. neoformans* retains the Dsn1 autoinhibitory domain (Fig. 1a and  
22 Supplementary Fig. 6d). Although a recent study suggests Nnf1 to be the Dsn1 homolog in *D.*  
23 *melanogaster*, we were unable to identify the presence of the Dsn1 autoinhibitory domain in the  
24 suggested homolog<sup>39</sup>. Through our findings, we propose a role for bridgin towards linking the outer  
25 kinetochore by its recruitment and interaction with multiple KMN network proteins and DNA thereby  
26 promoting accurate kinetochore-microtubule attachments in *C. neoformans* (Fig. 6f).

27 An inability of the BD to localize specifically to the kinetochore and non-reliance of bridgin on  
28 sequence specificity for BD function endorses the hypothesis that binding of bridgin BD to DNA is a  
29 consequence of specific kinetochore recruitment (Fig. 6f). Rather unique to bridgin as a linker protein

1 is the fact that its kinetochore localization is dependent on conserved KMN network proteins, Sos7  
2 (KNL1C), and the Mis12C-Ndc80C platform (Fig. 2d, e, and g). CENP-T homologs require other  
3 CCAN proteins for its kinetochore localization<sup>29,59,60</sup> and binds non-specifically to DNA *in vitro*. CENP-  
4 T<sup>Cnn1</sup> was shown to increase the stability of a mini-chromosome possibly due to its ability to recruit the  
5 Ndc80C as suggested in a recent study<sup>29,40</sup>, while CENP-T in metazoans was shown to recruit the  
6 KMN network when ectopically tethered<sup>30,32,61</sup>. Bridgin does not appear to influence the recruitment of  
7 outer kinetochore proteins (Supplementary Fig4. g-i), further supported by the lack of Ndc80  
8 mislocalization upon recruitment of bridgin to ectopic sites (Fig. 5e and Supplementary Fig. 5c).  
9 Bridgin levels at the kinetochore reach a peak at anaphase (Fig. 2i and l), a time when Aurora B<sup>ipl1</sup>-  
10 mediated phosphorylation is suggested to be countered by phosphatase activity (Fig. 6f). The sharp  
11 reduction of AuroraB<sup>ipl1</sup> localization at anaphase kinetochores<sup>48</sup> and essentiality of amino-terminus of  
12 CENP-C<sup>Mif2</sup> (Supplementary Fig. 6e and data not shown) are observed in *C. neoformans*. Taken  
13 together, we propose that the kinetochore architecture alters during the metaphase-anaphase  
14 transition and the bridgin linker pathway functions to reinforce/stabilize the outer kinetochore. Thus,  
15 an important question we must address in future is whether the presence of Dsn1 autoinhibition can  
16 provide a constraint driving evolution/maintenance of multiple outer kinetochore linker pathways  
17 required for outer kinetochore reinforcement in organisms with monocentric chromosomes.

18 Outer kinetochore proteins are found to be more conserved than their inner kinetochore counterparts,  
19 including linker proteins, across eukaryotes<sup>39,42</sup> (Fig. 1a). Thus, additional KMN recruited linker  
20 pathways like the bridgin-pathway may provide cells with an effective alternative towards outer  
21 kinetochore reinforcement. Bridgin homologs are identified across all basidiomycete sub-phyllum (Fig.  
22 6f and Supplementary Table 5). Strikingly, an inability to identify bridgin homologs is specific orders  
23 correlates with the presence of multiple known linker pathways (Fig. 6g). It would be worth  
24 investigating whether the presence of multiple linker pathways may have allowed for flexibility in the  
25 retention of specific linker pathways in basidiomycetes. Genome sequencing of a greater number of  
26 distinct basidiomycetes would help address the correlation. It would be intriguing to recognize the  
27 contribution of the multiple linker pathways in organisms like *U. maydis* which retained CENP-T,  
28 CENP-C in addition to bridgin.

29 The identification of bridgin homologs in the basal ascomycetes of the class Pneumocystidales, such  
30 as in *Pneumocystis jirovecii* (causative organism of pneumonia), and Taphrinales, and further,

1 identification of bridgin-like proteins outside fungi may suggest a more ancient origin of this class of  
2 kinetochore proteins containing a FHA domain (Supplementary Fig. 6f). In metazoans, the identified  
3 proteins with bridgin-like architecture (an amino-terminal FHA domain followed by a PP1 docking site,  
4 an unstructured central region containing repeats and a basic carboxy-terminus, Supplementary Fig.  
5 6f) was found to code for Ki67, a component of the mitotic chromosome periphery<sup>50,62</sup>. The role of  
6 bridgin-like proteins outside Metazoa is not known.

7 Future experiments will have to reveal how bridgin's kinetochore recruitment and DNA/chromatin  
8 binding is regulated and the extent of its ability to bear load at the kinetochore. Furthermore, towards  
9 understanding bridgin biology, addressing if bridgin has additional functions at the kinetochore, for  
10 example, through PP1 recruitment is essential. We also are looking forward to screening other hits  
11 obtained as part of the *C. neoformans* kinetochore interactome. We hope further studies on non-  
12 conventional model systems like *C. neoformans* will help reveal conserved fundamental principles of  
13 the kinetochore architecture and its organization.

## 14 **ONLINE METHODS**

### 15 **Homolog detection**

16 All searches were carried out in the NCBI non-redundant protein database or the UniProtKB.  
17 Searches for kinetochore homologs were initially carried out using iterative HMMER<sup>63</sup> jackhammer  
18 searches (E-value  $\leq 10^{-3}$ ) with Pfam models for the mentioned kinetochore proteins. When available  
19 models of both yeast and metazoan kinetochore homologs were considered. Obtained hits were  
20 validated by performing reciprocal HMMER searches. Secondary structure of obtained hits was  
21 validated using Jpred4 and tertiary structure prediction using HHpred<sup>64</sup> and/or Phyre2<sup>65</sup>. Protein  
22 sequences which were unable to produce hits upon reciprocal searches or failed to conform to  
23 expected secondary and tertiary structures were discarded. Further searches were performed with the  
24 same criteria using identified homologs phylogenetically closest to the species in question. Species  
25 considered in the study are mentioned in Supplementary Table 1, when homologs were not identified  
26 from a specific strain, an obtained homolog from another strain of the same species was considered.  
27 If multiple splice variants were identified the longest splice variant was mentioned. Obtained hits when  
28 possible was validated with the identified homologs from *C. neoformans*. Known kinetochore

1 homologs from *S. cerevisiae*, *S. pombe*, *D. melanogaster*, and *H. sapiens* were used to draw the  
2 matrix of kinetochore homologs.

3 Towards identifying homologs of bridgin, the conserved FHA domain was taken as the bait for  
4 subsequent iterative HMMER jackhammer searches. Obtained hits were further screened for overall  
5 protein architecture (amino-terminus FHA domain, an unstructured central region and a basic  
6 carboxy-terminus, Supplementary Fig. 6f). Probability of protein disorder was predicted using  
7 IUPred2A<sup>66</sup> and pI of the amino acid residues was predicted using ProtParam<sup>67</sup>. Amongst  
8 pucciniomycetes, *Exidia glandulosa* and *Sistotremastrum suecicum* the basic C-terminus is ~150 aa.  
9 in contrast to ~300 in other organisms.

10 Using published multi-gene and genome-scale phylogenetic data from The Fungal Kingdom<sup>68</sup>, JGI  
11 MycoCosm<sup>69</sup>, Interactive Tree of Life (iTOL) v4<sup>70</sup> and Wang, Q. M. *et al*<sup>71</sup> the cladograms were drawn  
12 showing the relationship amongst the considered species.

### 13 **Yeast strains and plasmids.**

14 A list of strains and plasmids used in the study can be found in Supplementary Table 6. Primers used  
15 to generate the constructs are mentioned in Supplementary Table 7.

16 Conditional kinetochore mutant strains were grown on 1 % yeast extract, 2 % peptone, and 2 %  
17 galactose (YPG). All other strains were grown in 1 % yeast extract, 2 % peptone, and 2 % dextrose  
18 (YPD) at 30°C, 180 rpm unless mentioned otherwise. Strains were maintained on YPD/YPG solidified  
19 with 2% agar and stored at 4°C or -80°C in 15% glycerol. Yeast strains are based on the haploid type  
20 strain H99α or KN99a and generated by the standard procedure as previously described<sup>44</sup>. In brief,  
21 created native tagging and Gal7 promoter replacement cassettes were excised from the plasmid  
22 construct, over-expression cassettes were linearized by appropriate restriction enzymes, and deletion  
23 cassettes were generated by overlap PCR and transformed into *C. neoformans* strains of appropriate  
24 background by biolistic transformation<sup>72</sup>. Transformed cells were selected on drug selection in YPG  
25 for Gal7 promoter<sup>73</sup> replacement strains to generate conditional mutants and YPD for all other strains.

### 26 **Protein affinity purification and native chromatin immunoprecipitation.**

27 An overnight culture was inoculated at 0.1 OD<sub>600</sub> into fresh YPD. Grown until ~0.7 OD<sub>600</sub> and treated  
28 with 10 µg/ml of thiabendazole (TBZ) for 3 h. Cells were harvest, washed once in water followed by

1 one wash with binding buffer BB150 (25 mM HEPES pH 8.0, 2 mM MgCl<sub>2</sub>, 0.1 mM EDTA, 0.5 mM  
2 EGTA, 0.1 % NP-40, 150 mM KCl, 1x complete EDTA-free protease inhibitor (Roche) and 1x  
3 PhosStop (Roche) and 15 % glycerol). Cells were resuspended in binding buffer (100 OD<sub>600</sub>/ml). Bead  
4 beating was used to lyse the cell suspension until ~80% cell lysis was obtained. Lysates were  
5 centrifuged at 15k rpm for 20 min, and the supernatant was collected. The extracted cell lysate was  
6 incubated with anti-FLAG M2 antibodies (Sigma) conjugated to Dynabeads™ M-280 sheep anti-  
7 mouse IgG (ThermoFisher Scientific) for 2 h at 4°C, under constant rotation. Unbound proteins were  
8 collected as flow-through and proteins bound to antibody-conjugated beads were washed five times  
9 with BB150 w/o glycerol, invert mixing was followed during each wash. Bound proteins were eluted in  
10 BB150 w/o glycerol + 200 µg/ml of 3x FLAG peptide (Sigma). Two elutes of ~½ volume each of initial  
11 bead volume was taken and pooled.

12 1 µg of Anti-FLAG M2 antibody was conjugation to 10 µl of Dynabeads™ M-280 sheep anti-mouse  
13 IgG (ThermoFisher Scientific) in 1x phosphate-buffered saline (PBS), pH 7.4, and incubation for 1 h at  
14 room temperature (RT). Washed twice with 1x PBS and resuspended in PBS. This anti-FLAG  
15 conjugated beads were used for the lysate prepared from 100 OD<sub>600</sub> culture.

16 Affinity purification samples that were processed subsequently for mass spectrometry was started  
17 from a 2.25 L culture, yielding ~4500 OD<sub>600</sub> cells. 300 mM KCl, where mentioned in experiments was  
18 used throughout the affinity purification experiment as part of the binding buffer yielding BB300.

19 For GFP affinity purification, GFP-Trap agarose beads (ChromoTek) were used. Bound proteins were  
20 eluted by boiling the beads for 10 min in 1x sample loading buffer (50 mM Tris-HCl pH 6.8, 2% SDS,  
21 0.05% bromophenol blue, 10% glycerol, 5% 2-Mercaptoethanol) and the supernatant was collected.  
22 Other steps of the affinity purification protocol were kept the same as mentioned above.

23 For native-ChiP, lysate preparation, affinity purification, and isolation of the bound proteins were as  
24 mentioned above. DNA from the elute and input sample was extracted using MagExtractor clean-up  
25 kit (TOYOBO). PCR for the identical dilution of input and IP was set-up using centromere 14 primers  
26 (5'-GGTGATGCTACCTCGGT-3' and 5'-CCCGACGACTGTATCAGTTA-3') and non-centromere  
27 control primers (5'-GATCAAGTATAGGCGAAGG-3' and 5'-CATCTCTTATTCCCACTTCTACTC-3')  
28 located on the gene body of CNAG\_00063, located ~825 kb away from the centromere on  
29 chromosome 1 (Fig. 2a).



## 1 **Immunoblot analysis.**

2 For whole-cell lysates, 3 OD<sub>600</sub> cells were harvested and resuspended in 15% TCA overnight. 500 µl  
3 0.5 mm glass beads were added, and samples were vortexed for a total time of 15min, with  
4 intermittent cooling on ice. Centrifuged at 13k rpm for 10 min and the obtained pellet was washed  
5 twice with 100% acetone, air-dried and resuspended in 1x sample loading buffer and boiled for 10min.  
6 Samples were separated on an SDS-PAGE and transferred to Immobilon-P (Merck).

7 For Supplementary Fig. 1c and 5b and e, primary antibody and secondary antibody dilutions were  
8 made in skim milk. Proteins bound by antibodies were detected with Clarity western ECL (BioRad)  
9 and visualized with Versadoc (BioRad). For Figure 5c and Supplementary Fig. 1a and 4k, primary and  
10 secondary antibody dilution were prepared in Signal Enhancer Hikari (Nacalai tesque). ChemiDoc  
11 Touch (Bio-Rad) was used to visualize proteins reacting with antibody in the presence of the  
12 substrate ECL Prime (GE Healthcare). ImageJ<sup>74,75</sup> and Image lab (BioRad) was used to visualize and  
13 process images. Antibodies used are tabulated in Supplementary Table 8.

## 14 **Mass spectrometry.**

15 Affinity purified samples were separated on an SDS-PAGE followed by silver staining. Isolated  
16 samples from the stained gel were Trypsin digested. Samples were subject to nano LC-MS-MS as  
17 described previously<sup>76</sup>. Using the MASCOT ver2.6.2 search engine in Proteome Discoverer 2.1.1.21  
18 and 2.2.0.388 (ThermoFisher Scientific) the obtained spectra peaks were assigned using the UniProt  
19 proteome database for *C. neoformans* H99α database (ID: UP000010091 20171201downloaded  
20 (7340 sequences)). Fragment tolerance 0.80 Da (Monoisotopic), parent tolerance 10 PPM  
21 (Monoisotopic), fixed modification of +57 on C (Carbamidomethyl), variable modification of +16 on M  
22 (oxidation) and +42 on Peptide amino-terminus (Acetyl) and allowing for a maximum of 2 missed  
23 cleavages for CENP-C<sup>Mif2</sup>, Dsn1 and Spc25 and 3 missed cleavages for bridgin samples. The  
24 obtained results were visualized using Scaffold 4.8.9 (Proteome Software). A minimum threshold for  
25 peptide (95%), and protein (99%) in addition to the identification of a minimum of two unique peptides  
26 were considered as hits after normalization with untagged control spectra. Identified protein hits from  
27 CENP-C<sup>Mif2</sup>, Dsn1, Spc25, and their untagged controls can be found in Supplementary Table 2. To  
28 relatively quantitate protein abundance obtained within each of the experiments Bgi1<sup>FL</sup> 150 mM,  
29 Bgi1<sup>FL</sup> 300 mM, and Bgi1<sup>BDΔ</sup> 150 mM, emPAI<sup>77</sup> (exponentially modified protein abundance index)

1 values were determined using Scaffold 4.8.9 (Proteome Software). Higher the emPAI score, more  
2 abundant the protein is in the mixture. Supplementary Table 4 summarizes the identified interacting  
3 protein hits from Bgi1<sup>FL</sup>, Bgi1<sup>BDA</sup>, and their untagged control IPs.

#### 4 **Cross-linked chromatin immunoprecipitation and quantitative real-time PCR.**

5 ChIP assays were performed with some modification of previously described protocols<sup>78,79</sup>. In brief,  
6 100 ml of Bgi1-GFP strain was grown until ~1 OD<sub>600</sub>. Cross-linking was performed for 20min using  
7 formaldehyde to a final concentration of 1% and incubated at RT with intermittent mixing. The reaction  
8 was quenched by the addition of 2.5M glycine and further incubated for 5 min. Fixed cells were  
9 harvested by centrifugation and resuspended in 9.5 ml of deionized water, followed by the addition of  
10 0.5 ml of 2-Mercaptoethanol and incubated at 30°C for 60 min at 180 rpm. Cells were pelleted and  
11 resuspended in 10 ml spheroplasting buffer (1 M sorbitol, 0.1 M sodium citrate, and 0.01 M EDTA)  
12 containing 40 mg of lysing enzyme from *Trichoderma harzianum* (Sigma). Spheroplasts were washed  
13 once with 15 ml each of the following buffers, 1) 1x PBS 2) Buffer I (0.25% Triton X-100, 10 mM  
14 EDTA, 0.5 mM EGTA, 10 mM Na-HEPES pH 6.5) and 3) Buffer II (200 mM NaCl, 1 mM EDTA, 0.5  
15 mM EGTA, 10 mM Na-HEPES pH 6.5). Following which the spheroplasts were resuspended in 1 ml  
16 of extraction buffer (50 mM HEPES pH 7.4, 1% Triton X-100, 140 mM NaCl, 0.1% Na-Deoxycholate,  
17 1 mM EDTA) and sonicated to shear chromatin using a Bioruptor (Diagenode) for 30 cycles of 30 s on  
18 and 30 s off bursts at high-intensity setting. Sheared chromatin was isolated in the supernatant  
19 fraction after centrifugation for 15 min at 13k rpm. Average chromatin fragment sizes ranged from  
20 200-500 bp. 100 µl, 1/10<sup>th</sup> the volume, of the chromatin fraction, was kept for input DNA preparation,  
21 the remaining chromatin volume was divided into two halves of 450 µl each for (+) antibody and (-)  
22 antibody. For (+) antibody 20 µl of GFP-Trap agarose beads (ChromoTek) and 20 µl of blocked  
23 agarose beads (ChromoTek) was added to (-). The tubes were incubated for 8 h to overnight on a  
24 rotator at 4°C. Following which the supernatant was isolated as flow-through, and the beads were  
25 washed twice with low salt buffer, twice with high salt buffer, once with LiCl buffer and twice with TE.  
26 Bound chromatin was eluted in two 250 µl elution using elution buffer. All three fractions (SM, (+Ab)  
27 and (-Ab)) were de-crosslinked (mixed with 20 µl of 5 M NaCl and incubated at 65°C for 8 h to  
28 overnight), Proteinase K treated (10 µl of 0.5M EDTA, 20 µl of 1 M Tris-HCl pH 6.8, 40 mg Proteinase  
29 K was added to the solution and incubated for up to 2 h at 45°C) and DNA was isolated using phenol:

1 chloroform extraction followed by ethanol precipitation. Isolated DNA was air-dried and dissolved in  
2 25  $\mu$ l of de-ionized water containing 25  $\mu$ g/ml of RNase (Sigma).  
3 All three samples (SM, (+) and (-) antibody) were subject to Real-time quantitative PCR. The reaction  
4 mixture was set up using the iTaq™ universal SYBR green Supermix (BioRad) with 1  $\mu$ l of the  
5 undiluted (+Ab), (-Ab) DNA samples and SM (diluted 1:50). CN1 (CEN 14)-5'-  
6 CCATCCAGTTCTTGCTTGAG-3' 5'-GCAAGGAATGTGTTGTCTGG-3' and CN3 (CEN 2)-5'-  
7 CAGACCTTCCTTCAGCCG-3' 5'-TGGCAAGGAGTCGTCAGCG-3' was used to estimate  
8 centromeric enrichment levels and non-centromeric primer set NC3 5'-GATCAAGTATAGGCGAAGG-  
9 3' 5'-ATCTCTTATTCCCCTTCTACTC-3' located ~825 kb away from the centromere on  
10 chromosome 1 was used to normalize and obtained fold enrichment. Values were plot using  
11 GraphPad Prism.

## 12 **Fluorescence microscopy and analysis.**

13 Overnight cultures grown in YPD were sub-cultured into fresh YPD at 0.1 OD<sub>600</sub> and grown until 0.4-  
14 0.6 OD<sub>600</sub>. Cells were isolated, washed twice in 1x PBS and mounted on slides. Images for  
15 Supplementary Fig. 1g (CNAG\_01340) were acquired using the Airyscan mode in the Zeiss LSM 880  
16 confocal system equipped with an Airyscan module, 63x Plan Apochromat 1.4 NA. Z-stacks were  
17 obtained at an interval of 166 nm, 488/516 and 561/595 nm excitation/emission wavelengths were  
18 used GFP and mCherry respectively. Airyscan images were processed using Zen (Zeiss) and  
19 visualized in ImageJ<sup>74,75</sup>. Images for Figure 1f and Supplementary Fig. 1g and d were acquired in the  
20 Zeiss LSM 880 confocal system equipped with GaAsp photodetectors. Z-stacks were obtained at an  
21 interval of 300 nm, 488 nm and 561 nm excitation was used for GFP and mCherry respectively and  
22 emission between 490-553 nm and 571-651 nm was captured. Images are represented as maximum-  
23 intensity projections.

24 Live-cell microscopy, images for kinetochore quantitation and microscopy-based assays were  
25 acquired using the Zeiss Axio Observer 7, equipped with Definite Focus.2, Colibri 7 (LED light  
26 source), TempController 2000-2 (PECON), 100x Plan Apochromat 1.4 NA objective, pco.edge 4.2  
27 sCMOS and Andor iXon Ultra 897 electron-multiplying CCD (charge-coupled device). Zen 2.3 (blue  
28 edition) was used for image acquisition and controlling all hardware components. Filter set 92 HE with  
29 excitation 455-483 nm and 583-600 nm for GFP and mCherry respectively, and corresponding

1 emission was captured at 501-547 nm and 617-758 nm. To limit the time taken for an image, a  
2 complete Z-stack was obtained for each channel before switching.

3 For live-cell microscopy, an overnight culture was grown in YPD was sub-cultured into fresh YPD at  
4 ~0.1 OD<sub>600</sub> and grown for 2-3 generations until 0.4-0.8 OD<sub>600</sub>. Cells were harvested, washed in 1x  
5 PBS and resuspended in synthetic complete media with 3% dextrose. Cells were mounted onto an  
6 agarose pad (3% dextrose, 3% agarose in synthetic complete media) and sealed with petroleum jelly.  
7 Images were captured at time intervals of 0.5, 1, 2 or 4 min, as appropriate, with an EM gain of 300  
8 and Z interval of 300 nm. Z-stack projection of images are represented.

9 To study kinetochore interdependency, conditional strains were grown overnight in YPG, sub-cultured  
10 at 0.2 OD<sub>600</sub> and grown until 0.8-1 OD<sub>600</sub>. Cells were washed and resuspended in 1x PBS. Following  
11 which cells were inoculated into YPD (repressive) and YPG (permissive) at 0.1 OD<sub>600</sub>. Images were  
12 acquired after 6, 12, 15, 18, 9 and 18 h for CENP-C<sup>Mif2</sup>, Mis12<sup>Mtw1</sup>, Nuf2, Knl1<sup>Spc105</sup>, Dad1, and Dad2  
13 respectively. Z-stack was obtained at an interval of 300 nm. Single Z slice representing the maximum  
14 intensity of the tagged kinetochore proteins was represented. Quantitation of kinetochore signal was  
15 performed from large budded cells (budding index ~0.55-0.90).

16 To estimate the population of large-bud and cells with segregation defects, cells were grown until  
17 early-log phase 0.8-1 OD<sub>600</sub> after sub-culture from an overnight culture. Imaged using the above  
18 mentioned sCMOS camera with a Z-interval of 300 nm. Cells with a budding index of >0.55 were  
19 considered as large bud cells in mitosis. Chromatin marked with a tagged H4 construct was used to  
20 observe missegregation events.

21 Images for the over-expression assay of bridgin stains are representative maximum intensity  
22 projection images.

23 For live-cell quantitation of kinetochore signal, signal intensity was measured after the projection of Z-  
24 stacks. Kinetochore signal measurement in interdependency assays and *bgi1Δ* background were  
25 measured from the in-focus Z plane exhibiting the most intense signal. Background signal measured  
26 from a region neighboring the kinetochore measured signal in the same plane of the equal area was  
27 subtracted from the measured kinetochore intensity and normalized to the appropriate control and plot  
28 using GraphPad Prism 5.00 (GraphPad software). All acquired images were processed in ImageJ<sup>74,75</sup>.

1 For images wherein, brightness and contrast are modified the settings were applied uniformly across  
2 the entire image.

### 3 **Budding index calculation**

4 Budding index of a cell is defined as the ratio obtained by:

$$5 \quad \text{Diameter of daughter cell} / \text{Diameter of mother cell}$$

6 The diameter of the daughter and mother cell was measured along the mother-daughter axis using  
7 the line tool in ImageJ<sup>75</sup>

### 8 **Generation of recombinant proteins**

9 GST, GST-Bgi1<sup>FD</sup> (residues 1-130) and GST-Bgi1<sup>BD</sup> (residues 1000-1295) was expressed from  
10 pGEX-6P-1 (GE Healthcare) in Rosetta2 (DE3) (Merck). GST and GST-Bgi1<sup>BD</sup> were induced for  
11 expression using 1 mM IPTG for 3 h at 37°C. GST-FD was induced for expression overnight at 16°C  
12 using 0.2 mM IPTG. Cells were harvested and lysed in lysis buffer (20 mM HEPES pH 7.5, 300 mM  
13 NaCl, 1 mM EDTA, 0.5 mM TECP, 1x complete EDTA-free protease inhibitor (Roche)) and 1x PBS  
14 with 1x complete EDTA-free protease inhibitor (Roche) for GST and GST-Bgi1<sup>FD</sup>. GST fusion proteins  
15 were affinity purified using Glutathione sepharose 4b beads (GE Healthcare) and eluted using 20 mM  
16 glutathione. GST-Bgi1<sup>FD</sup> and GST-Bgi1<sup>BD</sup> were further purified using anion exchange  
17 chromatography. The column was equilibrated using 20 mM Tris-HCl pH 7.5, 1 mM DTT. Elution  
18 gradient of 5-75% NaCl was achieved using 20 mM Tris-HCl pH 7.5, 1 M NaCl, 1 mM DTT. Relevant  
19 fractions were pooled, concentrated in Amicon-Ultra (Merck), frozen in liquid nitrogen and stored at -  
20 80°C.

21 His-Bgi1<sup>FL</sup> was expressed in SF9 cells. Cells were resuspended and lysed in binding buffer (20 mM  
22 Tris-HCl pH 8.0, 500 mM NaCl, 5 mM Imidazole). His-Bgi1<sup>FL</sup> was affinity purified with Ni-NTA agarose  
23 (GE Healthcare), eluted with 20 mM Tris-HCl pH 8, 500 mM NaCl, 500 mM Imidazole. Purified protein  
24 was dialyzed against buffer containing Tris-HCl pH 7.5, 1 mM DTT and 100 mM NaCl. Samples were  
25 concentrated using Amicon-Ultra (Merck), frozen in liquid nitrogen and stored at -80°C. Absence of  
26 contaminating DNA was confirmed in all recombinant protein samples.

### 27 **Viability assay**

1 An overnight culture was inoculated into fresh YPD medium at 0.1 OD<sub>600</sub> and grown to ~0.8 OD<sub>600</sub>.  
2 The cell number was measured, followed by dilution of the cell suspension. 100-500 cells were  
3 subsequently plated on YPD solidified using 2% agar and grown for 2 days at 30°C. The number of  
4 colonies formed was measured and plot as normalized values to the WT strain.

#### 5 **Serial dilution growth analysis.**

6 Cells were grown overnight, inoculated into fresh YPD at 0.2 OD<sub>600</sub> and grown until 0.8-1 OD<sub>600</sub>.  
7 Following which cells were isolated and made up to 2 OD/ml in 1x PBS. Further dilutions were made  
8 as indicated in 1x PBS. 2 µl of the cell suspension was transferred onto appropriate agar plates as  
9 mentioned and incubated for 2 days for 30°C and 30°C + TBZ control and 2 µg/ml TBZ, 3 days for  
10 30°C + 4 µg/ml TBZ and 37°C and 7 days for 14°C.

#### 11 **Electrophoretic mobility shift assays.**

12 Purified recombinant proteins of mentioned molar ratio were incubated with 601 DNA (2.5 pMoles) or  
13 1 pMole of reconstituted nucleosomes in binding buffer (20 mM Tris pH 7.5, 100 mM NaCl, 5%  
14 glycerol and 1 mM DTT). Incubated for 1 h at 4°C and separated on a PAGE gel, stained with GelRed  
15 and visualized using a gel documentation system. Further, the gels were stained with Coomassie to  
16 visualize the protein complexes and imaged using a scanner.

#### 17 **Estimation of DNA methylation.**

18 Genomic DNA was isolated from overnight cultures of WT and *bgi1Δ*, using a modified glass bead  
19 protocol<sup>73</sup>. In brief, cells were suspended in a microfuge tube containing 500 µl of lysis buffer (50 mM  
20 Tris-HCl pH 7.5, 20 mM EDTA and 1% SDS) and 250 µl of glass beads. Cells were disrupted by  
21 vortexing for 5 min and centrifuged for 1 min at 13k rpm. To the supernatant 275 µl of 7 M ammonium  
22 acetate was added and incubated at 65°C for 5 min and rapidly chilled on ice for 5 min. 500µl of  
23 chloroform was added, mixed and centrifuged at 13k rpm for 3 min. The supernatant, containing DNA  
24 was precipitated with isopropanol, washed with 70% ethanol, dried and resuspended in 50 µl  
25 deionized water.

26 The isolated genomic DNA was digested separately with CpG methylation-sensitive (HhaI) or  
27 insensitive (HindIII) restriction enzymes overnight with a no enzyme (uncut) control reaction. The  
28 digested DNA was diluted 1:50 and used for PCR amplification. Primer sets for PCR amplification of

1 the centromeric region (5'-AGTCTCGTGTGGCTATGATT-3' and 5'-GGATCTGCTTGACAGTGTCA-  
2 3') and non-centromeric regions (5'-CCAACCGAAGCCCAAGACAA-3' and 5'-  
3 TTGAAGGATGATCCGGCCGA-3') were used. Obtained PCR products were subsequently separated  
4 by agarose gel electrophoresis using a 1% agarose gel and visualized by EtBr staining.

#### 5 **Statistics and reproducibility.**

6 *P* values were assessed by unpaired, two-tailed *t*-test using GraphPad Prism 5.00 (GraphPad  
7 software). Error bars represent standard deviation (s.d.) or standard error of the mean (s.e.m.) as  
8 mentioned for each experiment. *N* for each experiment is mentioned in the figure legends.

9

#### 10 **ACKNOWLEDGMENTS**

11 The authors thank the members of the Sanyal and Fukagawa lab for inputs and discussions. We  
12 thank Daniel Gerlich (Institute of Molecular Biotechnology, Vienna, Austria) for generously providing  
13 us the Ki-67 plasmids. The authors are grateful to Masatoshi Hara, Mariko Ariyoshi, Reito Watanabe,  
14 and Fumiaki Makino from the Fukagawa lab for their technical assistance. We also thank Akira  
15 Shinohara and his lab members for allowing us to use their lab facilities. A joint grant from the  
16 Department of Science and Technology, India (DST) and Japanese Society for the Propagation of  
17 Science, Japan (JSPS) aided in the travel of S.S. between the Sanyal and Fukagawa labs. Research  
18 in the Sanyal lab was funded by intramural funding from JNCASR. S.S. thanks Council for Scientific  
19 and Industrial Research (CSIR) for his fellowship.

20

#### 21 **AUTHOR CONTRIBUTIONS**

22 S.S., K.S., T.H., and T.F. designed the experiments. S.S. performed the experiments. T.H. assisted  
23 with affinity purification for mass spectrometry, and R.N. performed the mass spectrometry. S.S., K.S.,  
24 and T.F. wrote the manuscript with discussion and inputs from all the authors.

25

#### 26 **COMPETING INTERESTS**

1 The authors declare no competing interests.

2

### 3 REFERENCES

- 4 1. Musacchio, A. & Desai, A. A Molecular View of Kinetochores Assembly and Function. *Biology*  
5 (*Basel*). **6**, 5 (2017).
- 6 2. McKinley, K. L. & Cheeseman, I. M. The molecular basis for centromere identity and function.  
7 *Nat. Rev. Mol. Cell Biol.* **17**, 16–29 (2015).
- 8 3. Fukagawa, T. & Earnshaw, W. C. The centromere: Chromatin foundation for the kinetochores  
9 machinery. *Dev. Cell* **30**, 496–508 (2014).
- 10 4. Yadav, V., Sreekumar, L., Guin, K. & Sanyal, K. Five pillars of centromeric chromatin in fungal  
11 pathogens. *PLoS Pathog.* **14**, 1–7 (2018).
- 12 5. Suzuki, A. *et al.* How the kinetochores couples microtubule force and centromere stretch to  
13 move chromosomes. *Nat. Cell Biol.* **18**, 382–392 (2016).
- 14 6. Musacchio, A. & Salmon, E. D. The spindle-assembly checkpoint in space and time. *Nat. Rev.*  
15 *Mol. Cell Biol.* **8**, 379–393 (2007).
- 16 7. Joglekar, A. P. & Kukreja, A. A. How Kinetochores Architecture Shapes the Mechanisms of Its  
17 Function. *Curr. Biol.* **27**, R816–R824 (2017).
- 18 8. Lara-Gonzalez, P., Westhorpe, F. G. & Taylor, S. S. The Spindle Assembly Checkpoint. *Curr.*  
19 *Biol.* **22**, R966–R980 (2012).
- 20 9. Caldas, G. V. & DeLuca, J. G. Mad2 ‘opens’ Cdc20 for BubR1 binding. *Mol. Cell* **51**, 3–4  
21 (2013).
- 22 10. Earnshaw, W. C. & Rothfield, N. Identification of a family of human centromere proteins using  
23 autoimmune sera from patients with scleroderma. *Chromosoma* **91**, 313–321 (1985).
- 24 11. Tachiwana, H. *et al.* Crystal structure of the human centromeric nucleosome containing CENP-  
25 A. *Nature* **476**, 232–235 (2011).



- 1 12. A mutation in CSE4, an essential gene encoding a novel chromatin- associated protein in  
2 yeast, causes chromosome nondisjunction and cell cycle arrest at mitosis. *Genes Dev.* **9**, 573–  
3 586 (1995).
- 4 13. Perpelescu, M. & Fukagawa, T. The ABCs of CENPs. *Chromosoma* **120**, 425–446 (2011).
- 5 14. Foltz, D. R. *et al.* The human CENP-A centromeric nucleosome-associated complex. *Nat. Cell*  
6 *Biol.* **8**, 458–469 (2006).
- 7 15. Hori, T. *et al.* CCAN Makes Multiple Contacts with Centromeric DNA to Provide Distinct  
8 Pathways to the Outer Kinetochore. *Cell* **135**, 1039–1052 (2008).
- 9 16. Hinshaw, S. M. & Harrison, S. C. The structure of the Ctf19c/CCAN from budding yeast. *Elife*  
10 **8**, 1–21 (2019).
- 11 17. Varma, D. & Salmon, E. D. The KMN protein network - chief conductors of the kinetochore  
12 orchestra. *J. Cell Sci.* **125**, 5927–5936 (2012).
- 13 18. Joglekar, A. P., Bloom, K. & Salmon, E. D. In Vivo Protein Architecture of the Eukaryotic  
14 Kinetochore with Nanometer Scale Accuracy. *Curr. Biol.* **19**, 694–699 (2009).
- 15 19. Westermann, S. *et al.* Formation of a dynamic kinetochore-microtubule interface through  
16 assembly of the Dam1 ring complex. *Mol. Cell* **17**, 277–290 (2005).
- 17 20. Wang, X. *et al.* Sex-induced silencing defends the genome of *Cryptococcus neoformans* via  
18 RNAi. *Genes Dev.* **24**, 2566–2582 (2010).
- 19 21. Welburn, J. P. I. *et al.* The Human Kinetochore Ska1 Complex Facilitates Microtubule  
20 Depolymerization-Coupled Motility. *Dev. Cell* **16**, 374–385 (2009).
- 21 22. Van Hooff, J. J. E., Snel, B. & Kops, G. J. P. L. Unique phylogenetic distributions of the Ska  
22 and Dam1 complexes support functional analogy and suggest multiple parallel displacements  
23 of Ska by Dam1. *Genome Biol. Evol.* **9**, 1295–1303 (2017).
- 24 23. Thakur, J. & Sanyal, K. The Essentiality of the Fungus-Specific Dam1 Complex Is Correlated  
25 with a One-Kinetochore-One-Microtubule Interaction Present throughout the cell cycle,  
26 Independent of the Nature of a Centromere. *Eukaryot. Cell* **10**, 1295–1305 (2011).

- 1 24. Jenni, S. & Harrison, S. C. Structure of the DASH/Dam1 complex shows its role at the yeast  
2 kinetochore-microtubule interface. *Science (80-. )*. **360**, 552–558 (2018).
- 3 25. Cheeseman, I. M., Chappie, J. S., Wilson-Kubalek, E. M. & Desai, A. The Conserved KMN  
4 Network Constitutes the Core Microtubule-Binding Site of the Kinetochore. *Cell* **127**, 983–997  
5 (2006).
- 6 26. DeLuca, J. G. *et al.* Kinetochore Microtubule Dynamics and Attachment Stability Are  
7 Regulated by Hec1. *Cell* **127**, 969–982 (2006).
- 8 27. Alushin, G. M. *et al.* The Ndc80 kinetochore complex forms oligomeric arrays along  
9 microtubules. *Nature* **467**, 805–810 (2010).
- 10 28. Hara, M. & Fukagawa, T. Where is the right path heading from the centromere to spindle  
11 microtubules? *Cell Cycle* **0**, 1–13 (2019).
- 12 29. Lang, J., Barber, A. & Biggins, S. An assay for de novo kinetochore assembly reveals a key  
13 role for the CENP-T pathway in budding yeast. *Elife* **7**, (2018).
- 14 30. Hara, M., Ariyoshi, M., Okumura, E., Hori, T. & Fukagawa, T. Multiple phosphorylations control  
15 recruitment of the KMN network onto kinetochores. *Nat. Cell Biol.* **20**, 1378–1388 (2018).
- 16 31. Nishino, T. *et al.* CENP-T provides a structural platform for outer kinetochore assembly. *EMBO*  
17 *J.* **32**, 424–436 (2013).
- 18 32. Kim, S. & Yu, H. Multiple assembly mechanisms anchor the KMN spindle checkpoint platform  
19 at human mitotic kinetochores. *J. Cell Biol.* **208**, 181–196 (2015).
- 20 33. Dimitrova, Y. N., Jenni, S., Valverde, R., Khin, Y. & Harrison, S. C. Structure of the MIND  
21 Complex Defines a Regulatory Focus for Yeast Kinetochore Assembly. *Cell* **167**, 1014-  
22 1027.e12 (2016).
- 23 34. Hornung, P. *et al.* A cooperative mechanism drives budding yeast kinetochore assembly  
24 downstream of CENP-A. *J. Cell Biol.* **206**, 509–524 (2014).
- 25 35. Kato, H. *et al.* A Conserved Mechanism for Centromeric Nucleosome Recognition by  
26 Centromere Protein CENP-C. *Science (80-. )*. **340**, 1110–1113 (2013).

- 1 36. Nishino, T. *et al.* CENP-T-W-S-X forms a unique centromeric chromatin structure with a  
2 histone-like fold. *Cell* **148**, 487–501 (2012).
- 3 37. Huisin'T Veld, P. J. *et al.* Molecular basis of outer kinetochore assembly on CENP-T. *Elife* **5**,  
4 1–24 (2016).
- 5 38. D'Archivio, S. & Wickstead, B. Trypanosome outer kinetochore proteins suggest conservation  
6 of chromosome segregation machinery across eukaryotes. *J. Cell Biol.* **216**, 379–391 (2017).
- 7 39. van Hooff, J. J., Tromer, E., van Wijk, L. M., Snel, B. & Kops, G. J. Evolutionary dynamics of  
8 the kinetochore network in eukaryotes as revealed by comparative genomics. *EMBO Rep.* **18**,  
9 e201744102 (2017).
- 10 40. Schleiffer, A. *et al.* CENP-T proteins are conserved centromere receptors of the Ndc80  
11 complex. *Nat. Cell Biol.* **14**, 604–613 (2012).
- 12 41. Drinnenberg, I. A., deYoung, D., Henikoff, S. & Malik, H. S. ingh. Recurrent loss of CenH3 is  
13 associated with independent transitions to holocentricity in insects. *Elife* **3**, 1–19 (2014).
- 14 42. D'Archivio, S. & Wickstead, B. Trypanosome outer kinetochore proteins suggest conservation  
15 of chromosome segregation machinery across eukaryotes. *J. Cell Biol.* **216**, 379–391 (2017).
- 16 43. Tromer, E. C., van Hooff, J. J. E., Kops, G. J. P. L. & Snel, B. Mosaic origin of the eukaryotic  
17 kinetochore. *Proc. Natl. Acad. Sci.* **116**, 12873–12882 (2019).
- 18 44. Kozubowski, L. *et al.* Ordered kinetochore assembly in the human-pathogenic  
19 basidiomycetous yeast *Cryptococcus neoformans*. *MBio* **4**, (2013).
- 20 45. Lin, X. & Heitman, J. The Biology of the *Cryptococcus neoformans* Species Complex. *Annu.*  
21 *Rev. Microbiol.* **60**, 69–105 (2006).
- 22 46. Park, B. J. *et al.* Estimation of the current global burden of cryptococcal meningitis among  
23 persons living with HIV/AIDS. *AIDS* **23**, 525–530 (2009).
- 24 47. Yadav, V. *et al.* RNAi is a critical determinant of centromere evolution in closely related fungi.  
25 *Proc. Natl. Acad. Sci.* **115**, 3108–3113 (2018).
- 26 48. Varshney, N. *et al.* Spatio-temporal regulation of nuclear division by Aurora B kinase Ipl1 in

- 1 Cryptococcus neoformans. *PLoS Genet.* **15**, e1007959 (2019).
- 2 49. MacCallum, D. E. & Hall, P. a. The biochemical characterization of the DNA binding activity of  
3 pKi67. *J. Pathol.* **191**, 286–98 (2000).
- 4 50. Cuylen, S. *et al.* Ki-67 acts as a biological surfactant to disperse mitotic chromosomes. *Nature*  
5 **535**, 308–312 (2016).
- 6 51. Richter, M. M. *et al.* Network of protein interactions within the Drosophila inner kinetochore.  
7 *Open Biol.* **6**, 150238 (2016).
- 8 52. Liu, Y. *et al.* Insights from the reconstitution of the divergent outer kinetochore of Drosophila  
9 melanogaster. *Open Biol.* **6**, 150236 (2016).
- 10 53. Barth, T. K. *et al.* Identification of novel Drosophila centromere-associated proteins.  
11 *Proteomics* **14**, 2167–2178 (2014).
- 12 54. Drinnenberg, I. A., Henikoff, S. & Malik, H. S. Evolutionary Turnover of Kinetochore Proteins: A  
13 Ship of Theseus? *Trends Cell Biol.* **26**, 498–510 (2016).
- 14 55. Petrovic, A. *et al.* Structure of the MIS12 Complex and Molecular Basis of Its Interaction with  
15 CENP-C at Human Kinetochores. *Cell* **167**, 1028-1040.e15 (2016).
- 16 56. Milks, K. J., Moree, B. & Straight, A. F. Dissection of CENP-C-directed Centromere and  
17 Kinetochore Assembly. *Mol. Biol. Cell* **20**, 4246–4255 (2009).
- 18 57. Bock, L. J. *et al.* Cnn1 inhibits the interactions between the KMN complexes of the yeast  
19 kinetochore. *Nat. Cell Biol.* **14**, 614–624 (2012).
- 20 58. Venkei, Z. *et al.* Spatiotemporal dynamics of Spc105 regulates the assembly of the Drosophila  
21 kinetochore. *Open Biol.* **2**, 110032–110032 (2012).
- 22 59. Basilico, F. *et al.* The pseudo GTPase CENP-M drives human kinetochore assembly. *Elife* **3**,  
23 e02978 (2014).
- 24 60. Carroll, C. W., Milks, K. J. & Straight, A. F. Dual recognition of CENP-A nucleosomes is  
25 required for centromere assembly. *J. Cell Biol.* **189**, 1143–1155 (2010).
- 26 61. Gascoigne, K. E. *et al.* Induced ectopic kinetochore assembly bypasses the requirement for

- 1 CENP-A nucleosomes. *Cell* **145**, 410–422 (2011).
- 2 62. Booth, D. G. & Earnshaw, W. C. Ki-67 and the Chromosome Periphery Compartment in  
3 Mitosis. *Trends Cell Biol.* **27**, 906–916 (2017).
- 4 63. Potter, S. C. *et al.* HMMER web server: 2018 update. *Nucleic Acids Res.* **46**, W200–W204  
5 (2018).
- 6 64. Zimmermann, L. *et al.* A Completely Reimplemented MPI Bioinformatics Toolkit with a New  
7 HHpred Server at its Core. *J. Mol. Biol.* **430**, 2237–2243 (2018).
- 8 65. Lawrence A Kelley, Stefans Mezulis, Christopher M Yates, M. N. W. & M. J. E. S. The Phyre2  
9 web portal for protein modeling, prediction and analysis. *Nat. Protoc.* **10**, 845–858 (2015).
- 10 66. Mészáros, B., Erdős, G. & Dosztányi, Z. IUPred2A: Context-dependent prediction of protein  
11 disorder as a function of redox state and protein binding. *Nucleic Acids Res.* **46**, W329–W337  
12 (2018).
- 13 67. Gasteiger, E. *et al.* *The Proteomics Protocols Handbook. The Proteomics Protocols Handbook*  
14 *Protein Identification and Analysis Tools on the ExPASy Server* (Humana Press, 2005).  
15 doi:10.1385/1592598900
- 16 68. Heitman, J. *et al.* *The Fungal Kingdom.* (American Society of Microbiology, 2017).  
17 doi:10.1128/9781555819583
- 18 69. Grigoriev, I. V. *et al.* MycoCosm portal: Gearing up for 1000 fungal genomes. *Nucleic Acids*  
19 *Res.* **42**, 699–704 (2014).
- 20 70. Letunic, I. & Bork, P. Interactive Tree Of Life (iTOL) v4: recent updates and new  
21 developments. *Nucleic Acids Res.* **47**, W256–W259 (2019).
- 22 71. Wang, Q. M. *et al.* Multigene phylogeny and taxonomic revision of yeasts and related fungi in  
23 the Ustilaginomycotina. *Stud. Mycol.* **81**, 55–83 (2015).
- 24 72. Davidson, R. C. *et al.* Gene disruption by biolistic transformation in serotype D strains of  
25 *Cryptococcus neoformans*. *Fungal Genet. Biol.* **29**, 38–48 (2000).
- 26 73. Ruff, J. A., Lodge, J. K. & Baker, L. G. Three galactose inducible promoters for use in *C.*

- 1            neoformans var. grubii. *Fungal Genet. Biol.* **46**, 9–16 (2009).
- 2    74.    del Valle, J., de la Oliva, N., Muller, M., Stieglitz, T. & Navarro, X. Biocompatibility evaluation of  
3            parylene C and polyimide as substrates for peripheral nerve interfaces. in *2015 7th*  
4            *International IEEE/EMBS Conference on Neural Engineering (NER)* 442–445 (IEEE, 2015).  
5            doi:10.1109/NER.2015.7146654
- 6    75.    Abràmoff, M. D., Magalhães, P. J. & Ram, S. J. Image processing with ImageJ Part II.  
7            *Biophotonics Int.* **11**, 36–43 (2005).
- 8    76.    Oya, E. *et al.* H3K14 ubiquitylation promotes H3K9 methylation for heterochromatin assembly.  
9            *EMBO Rep.* **e48111**, (2019).
- 10   77.    Ishihama, Y. *et al.* Exponentially Modified Protein Abundance Index (emPAI) for Estimation of  
11            Absolute Protein Amount in Proteomics by the Number of Sequenced Peptides per Protein.  
12            *Mol. Cell. Proteomics* **4**, 1265–1272 (2005).
- 13   78.    Sanyal, K., Baum, M. & Carbon, J. Centromeric DNA sequences in the pathogenic yeast  
14            *Candida albicans* are all different and unique. *Proc. Natl. Acad. Sci. U. S. A.* **101**, 11374–9  
15            (2004).
- 16   79.    Dubin, M., Fuchs, J., Gräf, R., Schubert, I. & Nellen, W. Dynamics of a novel centromeric  
17            histone variant CenH3 reveals the evolutionary ancestral timing of centromere biogenesis.  
18            *Nucleic Acids Res.* **38**, 7526–7537 (2010).

1

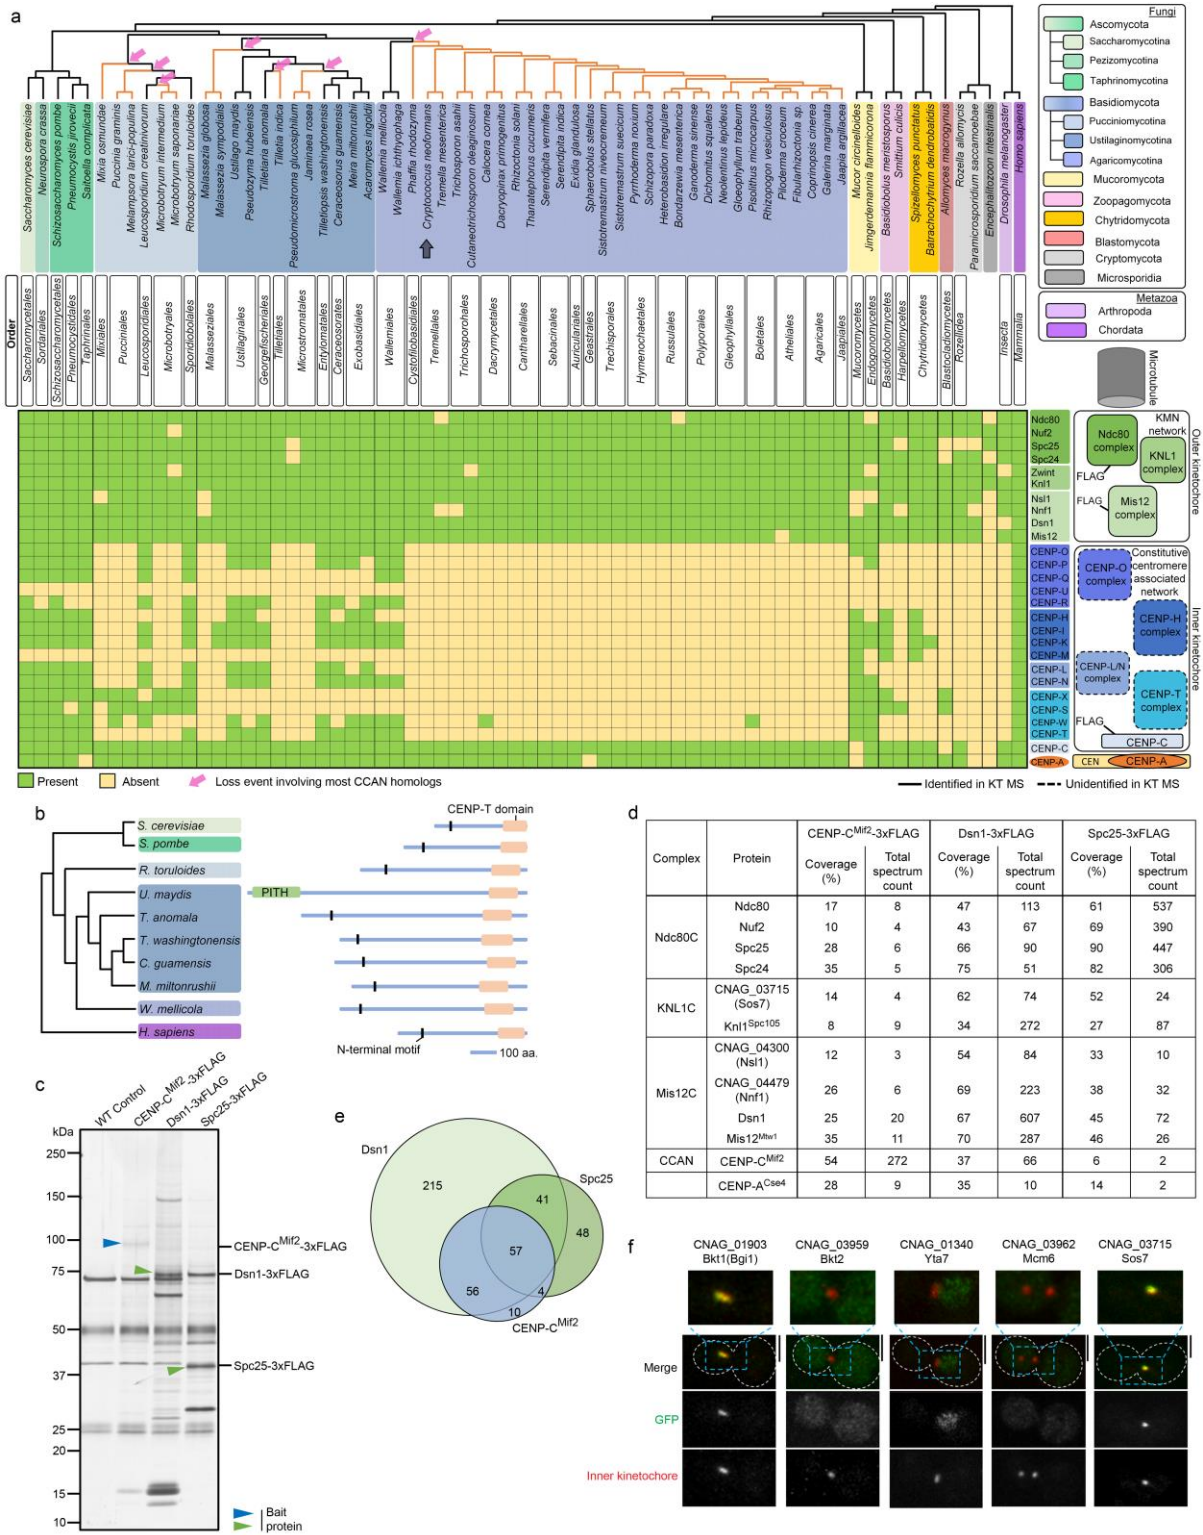

2

3

4 **Figure 1. Identification of the kinetochore interactome in *C. neoformans*.** (a) Conservation of  
 5 kinetochore proteins across mentioned species. Cladogram representing the relationship between the  
 6 species is drawn, and each sub-phylum is color-coded. Presence (green boxes) or absence (yellow  
 7 boxes) of each kinetochore protein is shown. Pink arrows indicate loss events of CCAN proteins  
 8 excluding CENP-C<sup>Mif2</sup>. FLAG labeling refers to proteins of kinetochore sub-complexes (CENP-C,  
 9 Mis12C, and Ndc80C) tagged in *C. neoformans* and used for the IP-MS identification of the

1 kinetochore interactome. Protein complexes identified (solid borders) or remained unidentified (dotted  
2 borders) by the IP-MS experiment in *C. neoformans* are shown. Grey arrow points to *C. neoformans*.  
3 Orange lines in the cladogram refer to basidiomycete lineages that have lost most CCAN  
4 components. **(b)** Domain architecture of identified CENP-T<sup>Cnn1</sup> homologs amongst basidiomycetes. **(c)**  
5 A silver-stained gel shows kinetochore interacting proteins in the thiabendazole treated G2/M  
6 enriched cell population in *C. neoformans*. Proteins bound to each of the 3xFLAG tagged bait proteins  
7 were separated on a gradient PAGE gel. The left-most lane of the untagged control strain shows  
8 commonly found contaminating proteins in the single-step FLAG affinity purification elute. **(d)** List of  
9 kinetochore proteins with the percentage of amino acid sequence coverage and the number of total  
10 peptides specific to the corresponding protein obtained by MS analysis. **(e)** Venn diagram of identified  
11 interacting proteins. Circles in green indicate components of the KMN network, Dsn1, and Spc25,  
12 while members of the CCAN, CENP-C<sup>Mif2</sup>, are shown in a blue circle. **(f)** Micrographs of *C.*  
13 *neoformans* cells at metaphase expressing GFP tagged proteins identified by the screen mentioned  
14 above. Kinetochores are marked by a mCherry tagged inner kinetochore proteins, CENP-C<sup>Mif2</sup> for  
15 Bgi1(Bkt1), Bkt2 and Yta7 or CENP-A<sup>Cse4</sup> for Mcm6 and Sos7. Scale bar, 3  $\mu$ m.

16

17



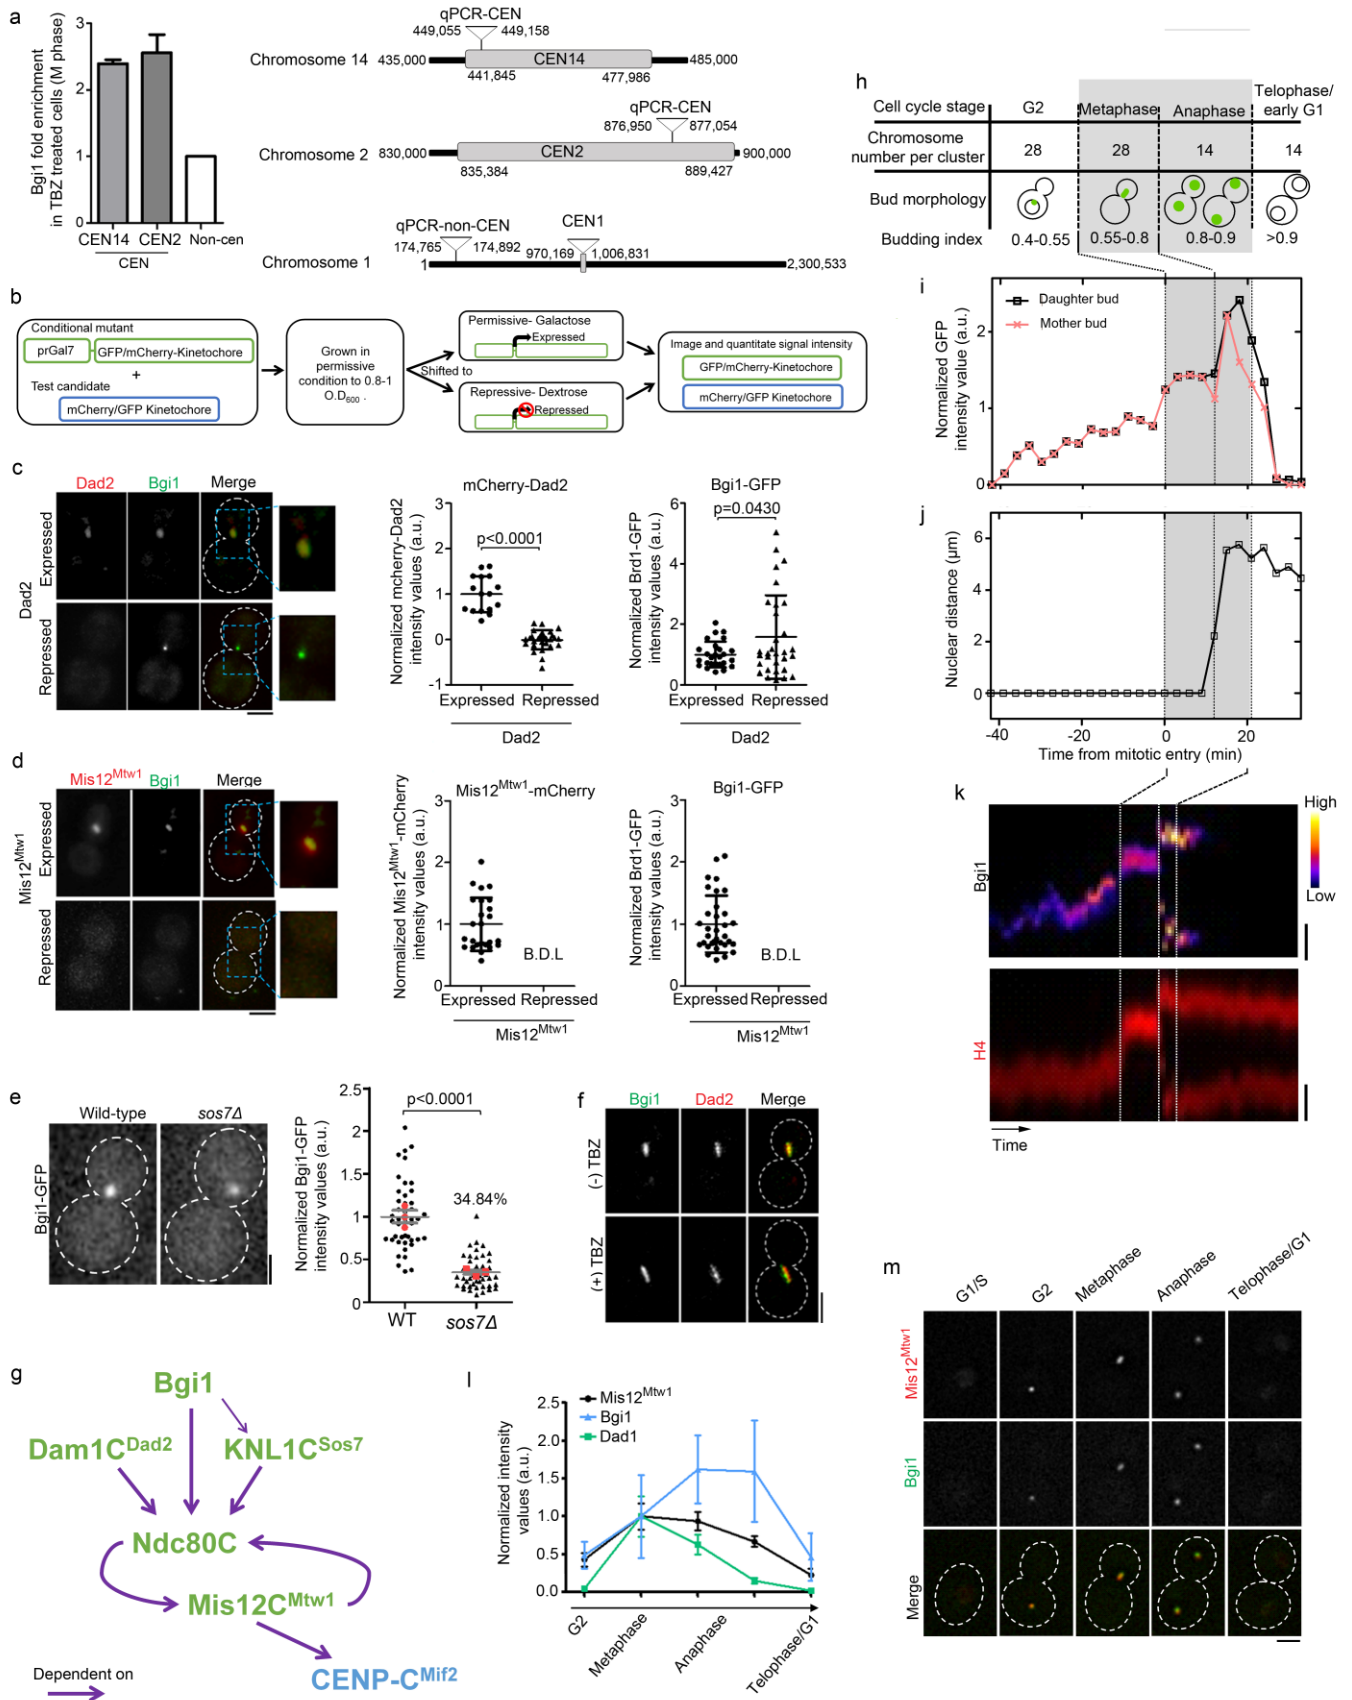

1

2 **Figure 2. A novel kinetochore bridgin assembles onto the KMN network, reaching a maximum**  
 3 **concentration during anaphase C. neoformans. (a)** Measurement of levels of bridgin at the  
 4 kinetochore in M phase cells by cross-linked ChIP-qPCR. Centromeres (CEN 14 and 2) and control

1 non-centromeric regions were amplified by specific primers to determine its levels at the centromere.  
2  $N=3$ . Error bars, s.d. Schematic is representing the location of centromeric-specific qPCR primers  
3 (*right*). **(b)** Schematic of the experimental design to determine localization interdependency amongst  
4 kinetochore sub-complexes. **(c)** Bridgin localization signals in representative cells in the presence and  
5 absence of Dad2 (*left*). Levels of Dad2 and bridgin signals upon Dad2 expression and repression are  
6 quantified. For Dad2 measurements,  $N=16$  and  $N=29$  or Dad2 expressed and repressed conditions,  
7 respectively. For Bgi1-GFP measurements,  $N=26$  and  $N=31$  for Dad2 expressed and repressed  
8 conditions respectively.  $P$ -value was determined using two-tailed t-test. Error bars, s.d. **(d)** Normalized  
9 intensities of Mis12<sup>Mtw1</sup> and bridgin under conditionals of Mis12<sup>Mtw1</sup> expression and repression. Strong  
10 influence of Mis12<sup>Mtw1</sup> kinetochore protein on bridgin resulted in signals that were below detectable  
11 levels (B.D.L). Scale bar, 3  $\mu\text{m}$ .  $N=25$  and  $N=33$  for Mis12<sup>Mtw1</sup> and bridgin, respectively. Error bars,  
12 s.d. **(e)** Bridgin signal intensities at the kinetochore were measured in WT and *sos7* $\Delta$  cells. Red dots  
13 indicate the mean bridgin signal intensities of three independent transformants. Error bars, s.e.m.  $P$ -  
14 value was determined using two-tailed t-test.  $N=45$ . Scale bar, 2  $\mu\text{m}$ . **(f)** Representative cells illustrate  
15 non-reliance of bridgin on an intact mitotic spindle for kinetochore localization. (+) TBZ cells were  
16 treated with 10  $\mu\text{g/ml}$  thiabendazole (TBZ) for 3 h. **(g)** Schematic describes the observed localization  
17 interdependency of kinetochore protein complexes at the *C. neoformans* kinetochore. Protein  
18 complexes indicated in green or blue correspond to the outer or inner kinetochore, respectively. **(h)**  
19 Expected chromosome number per kinetochore cluster in the haploid type-strain H99 $\alpha$  and spatial  
20 location of bridgin with corresponding budding index are tabled. **(i)** Signal intensity measurements of  
21 bridgin from G2 phase until the subsequent G1 phase are shown in a plot at an interval of 3 min. The  
22 event of mitotic entry is referred to as time point 0. **(j)** A cell is considered to have exited anaphase  
23 when nuclear distances have reached their maxima. **(k)** A kymograph of the corresponding tabulated  
24 bridgin signals. Time interval represented, 1 min for a total of 100 min. Scale bar, 2  $\mu\text{m}$ . **(l)**  
25 Comparison of protein levels of bridgin, and representative proteins of the outer kinetochore.  $N=5$   
26 each kinetochore protein. Error bars, s.d. **(m)** Co-localization of Bgi1-GFP signals in cells at the  
27 various stages of the cell cycle with Mis12<sup>Mtw1</sup> in an asynchronous culture. Scale bar, 3  $\mu\text{m}$ .

28

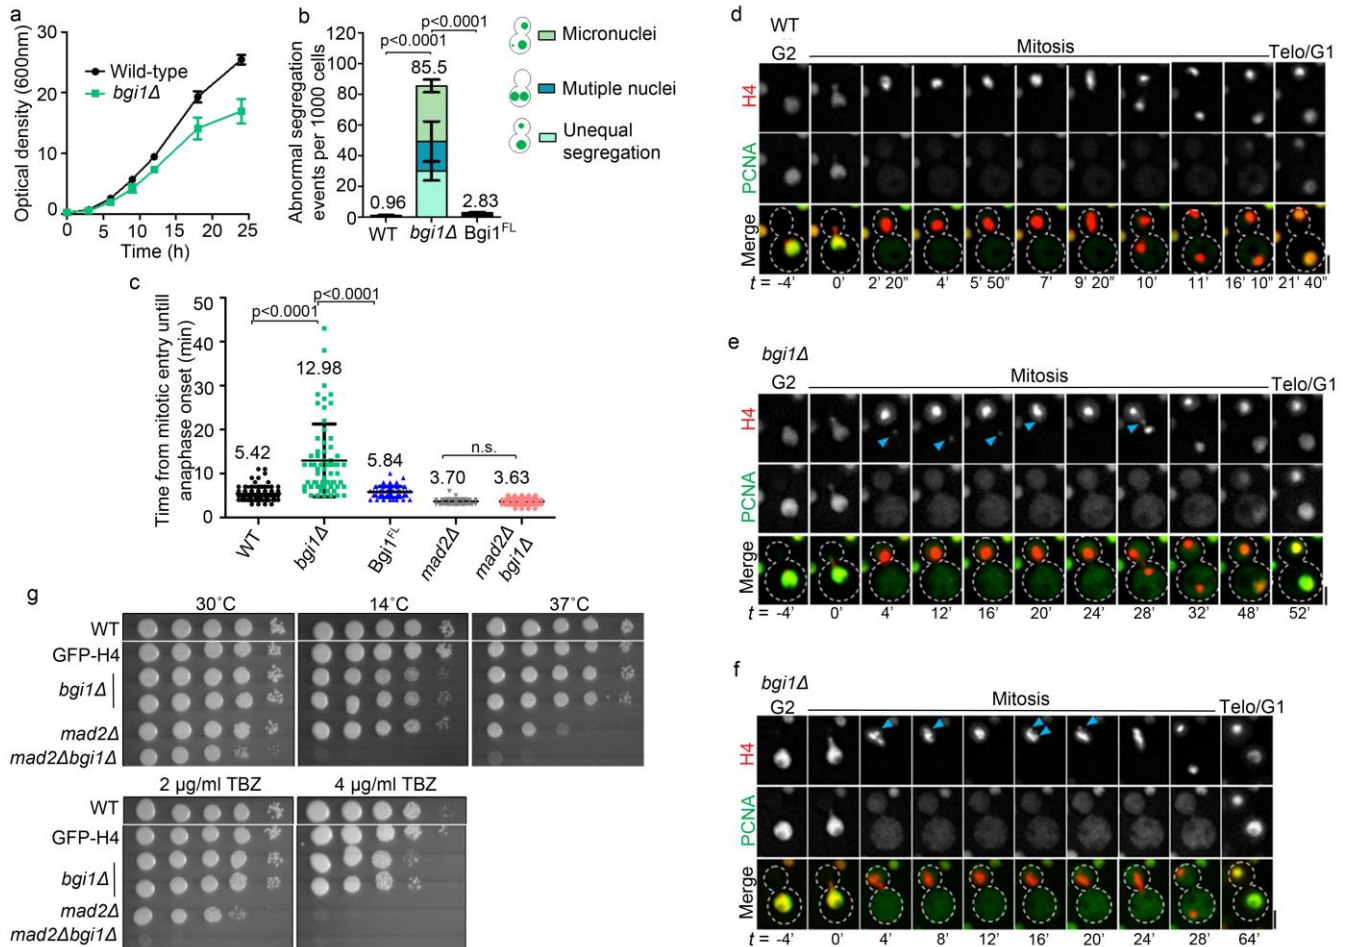

**Figure 3. Loss of bridgin impairs kinetochore-microtubule interactions. (a)** Growth curve of the WT strain H99α and bridgin null mutant (*bgi1Δ*) cells at 30°C. *N*=3. **(b)** The rate of abnormal nuclear segregation events was measured at 30°C using GFP-H4 in WT, *bgi1Δ*, and bridgin full-length re-integant (Bgi1<sup>FL</sup>) strains. The number of cells examined was >3000, *N*=3. Error bars, s.d. *P*-value was determined using two-tailed t-test. **(c)** Time from the mitotic entry to anaphase onset was quantified and plotted for each strain as indicated. Diffusion of a nuclear marker PCNA coincided with the migration of the nucleus into the daughter cell, indicating entry into semi-open mitosis. Nuclear distance >1 μm was considered as the entry into anaphase. Mean of WT (*N*=88), *bgi1Δ* (*N*=64), Bgi1<sup>FL</sup> (*N*=61), *mad2Δ* (*N*=67) and *mad2Δ bgi1Δ* (*N*=56) were measured as indicated. Error bars, s.d. *P*-value was determined using two-tailed t-test. Not significant, n.s. **(d-f)** Representative time-lapse images of **(d)** WT or **(e and f)** *bgi1Δ* cells. Time measurements were made from the mitotic onset. Cell cycle stages were scored for either by PCNA localization or chromatin condensation (H4-GFP) and nuclear migration into the daughter bud. Scale bar, 2 μm. **(e)** Blue arrows point to an unattached chromosome at the mitotic onset and a lagging chromosome at anaphase. **(f)** Blue arrows indicate a chromosome that is separated from the compact chromatin mass in prometaphase as seen in WT. **(g)** Serial 10-fold dilutions starting from 2x10<sup>5</sup> cells were spotted for WT, GFP-H4, *bgi1Δ*, *mad2Δ*, and *mad2Δ bgi1Δ* are shown.

1  
2

20

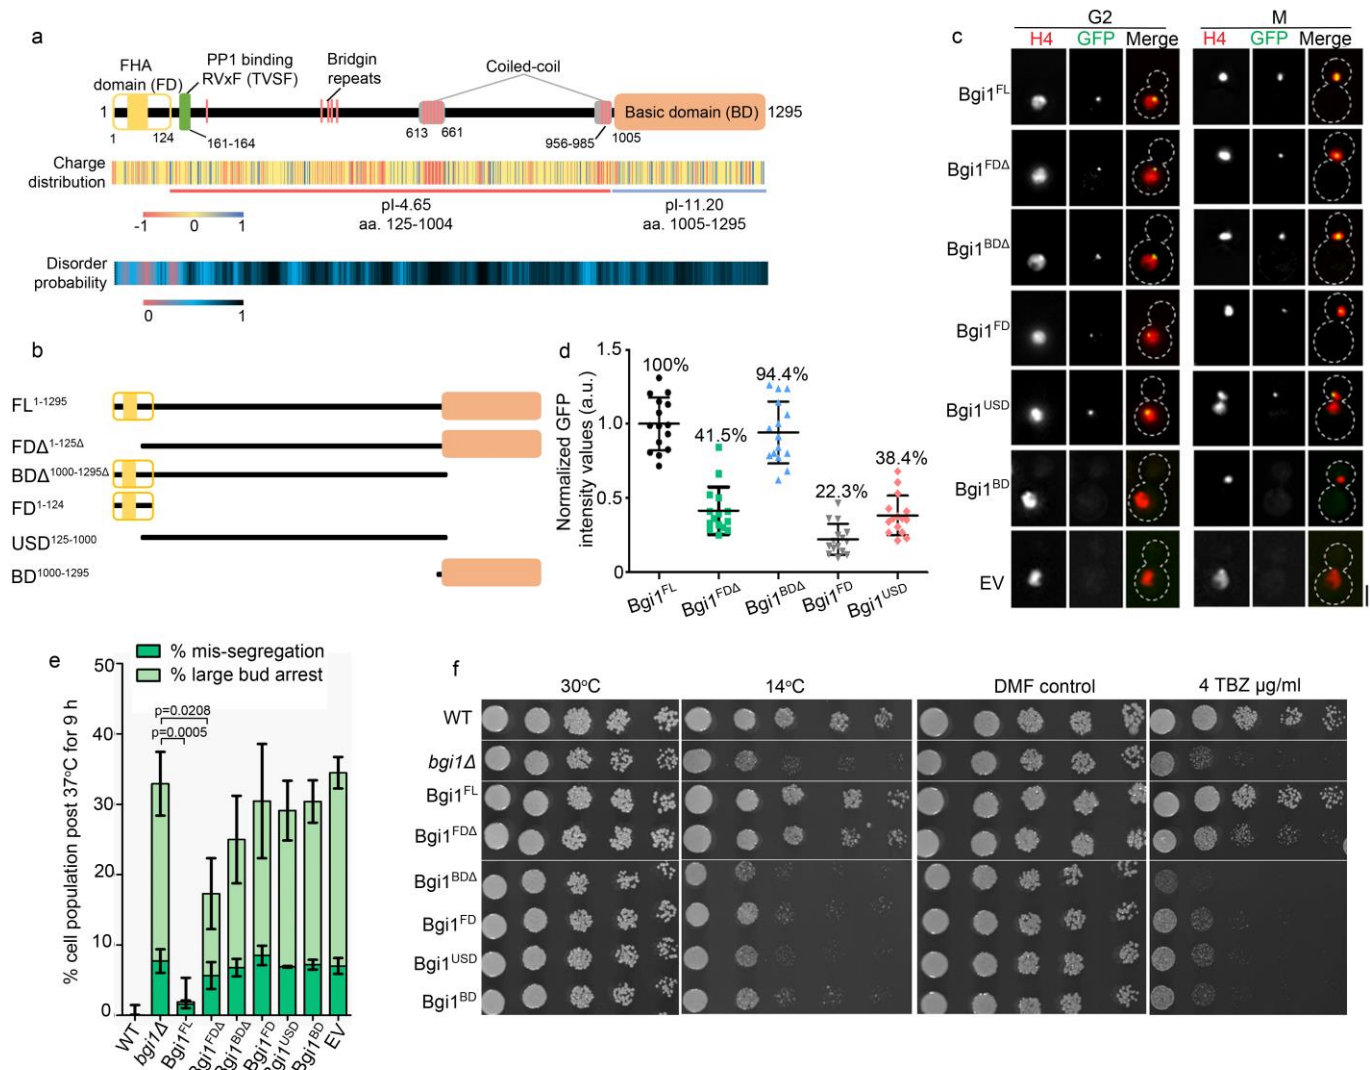

1  
2  
3  
4  
5  
6  
7  
8  
9  
10  
11  
12  
13  
14  
15  
16  
17  
18  
19

**Figure 4. Kinetochores recruitment and positioning of bridgin via multiple receptor sites are essential but insufficient for its function.** (a) Schematic describing predicted features of bridgin protein. Charge distribution of amino acid residues was predicted with a window size of 2 using EMBOSS charge. Disorder probability of bridgin was calculated using IUPRED2A. (b) Schematic of generated domain deletion constructs of bridgin. Constructs were generated with a 3xFLAG-GFP tag at the amino-terminus. (c) Representative cells in G2 and M phase showing localization of the mentioned bridgin or its derivatives and the control empty vector (EV). Nuclear localization was scored for using the chromatin marker histone H4. Scale bar, 3  $\mu$ m. (d) Bridgin signal intensities were measured in 15 mitotic cells prior to anaphase onset. Percent intensity values normalized to Bgi1<sup>FL</sup> have been mentioned. (e) The extent of complementation by truncated proteins of bridgin was measured. H4-mCherry was localized in bridgin protein derivatives, lacking various domains, in a *bgi1* $\Delta$  strain background. Cells were grown at 30°C until log phase and transferred to 37°C. Indicated cell populations were measured 9 h post-incubation at 37°C. All values were normalized to WT. Defects in nuclear segregation were measured as mentioned in Fig 3b. Error bars, s.d. The number of cells examined was >1000,  $N=3$  for each indicated strain.  $P$ -value was determined using two-tailed  $t$ -test. (f) Cells of varying numbers  $2 \times 10^4$ ,  $2 \times 10^3$ , 200, 100 and 50 cells were spotted on plates as indicated.

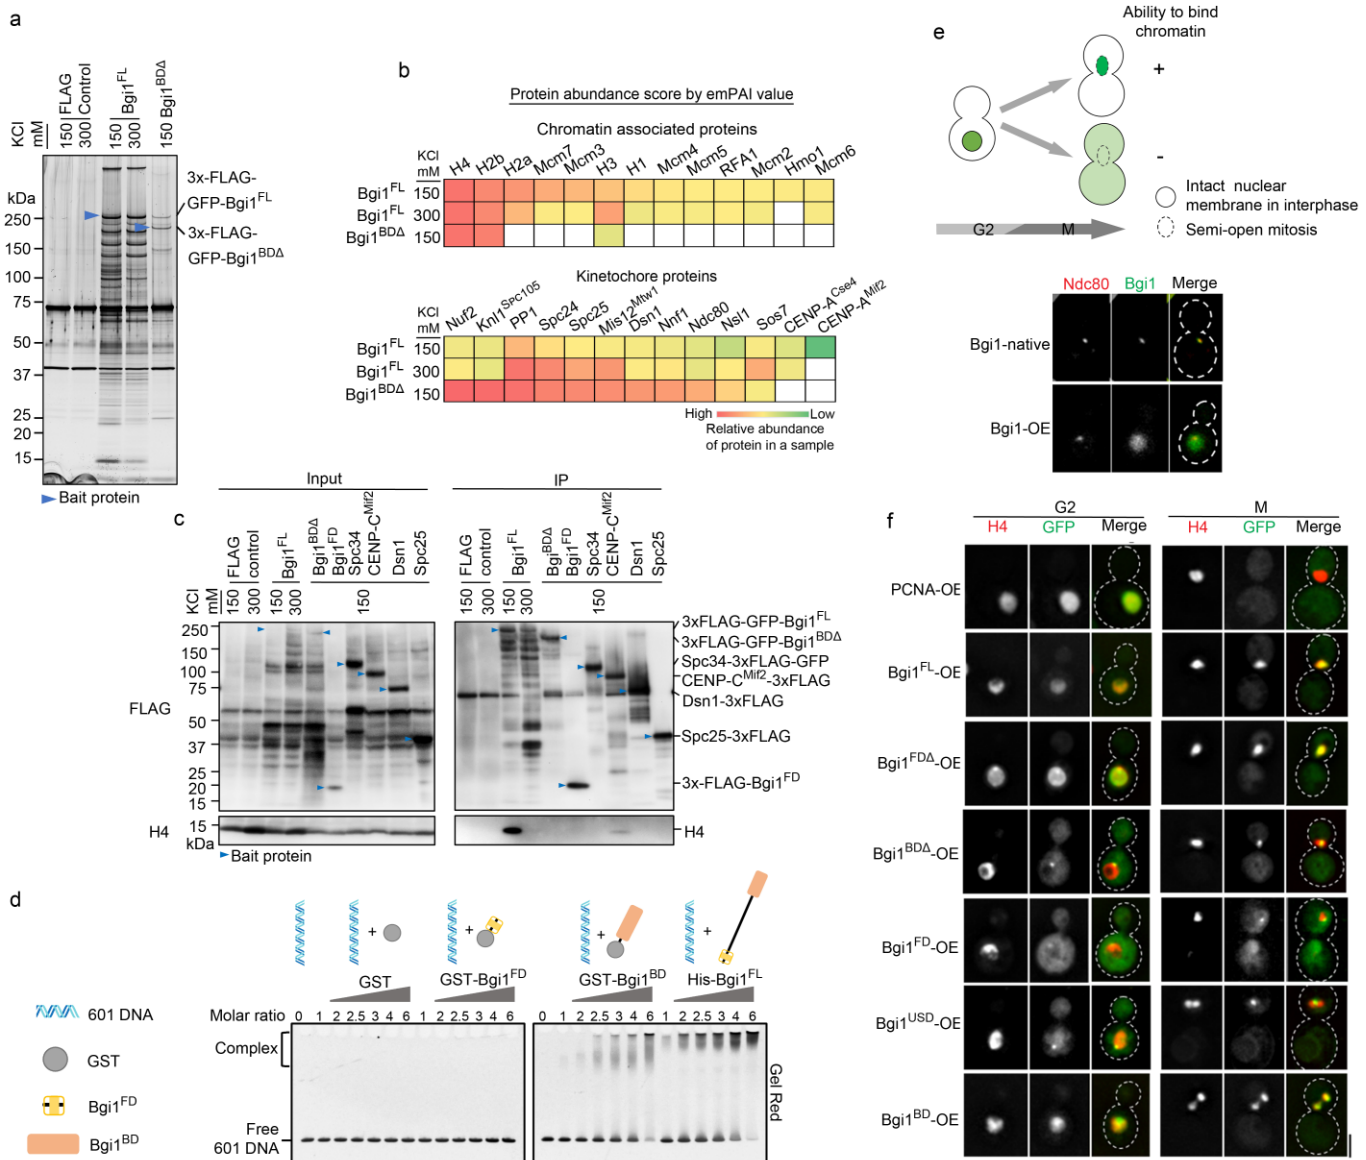

**Figure 5. The basic carboxy terminus of bridgin has a property to interact with DNA non-**

**specifically in vitro and in vivo. (a)** The silver-stained gel used to visualize bridgin interacting proteins. Blue arrows indicate the bait protein on each lane as applicable. Lysates for the immunoprecipitation experiment were prepared from a G2/M cell population that was enriched by treatment with 10  $\mu$ g/ml of TBZ for 3 h. Two left lanes show common contaminating proteins obtained in the single-step 3xFLAG affinity purification. **(b)** List of chromatin-associated and kinetochores proteins obtained as interactors from bridgin affinity purification. Top 10 known chromatin-associated proteins obtained in Bgi1<sup>FL</sup> 150 mM affinity purification (*top*) and known kinetochores proteins obtained in Bgi1<sup>BDA</sup> 150 mM affinity purification were chosen and arranged in ascending order from left to right based on relative abundance scores across each IP. The scores are based on emPAI values obtained for interacting proteins across affinity purifications. Undetected proteins are represented by white boxes. **(c)** Proteins from 3xFLAG tagged strains were extracted, and affinity purifications were performed with FLAG antibodies. Interacting proteins were eluted with 3xFLAG peptides, and blots were probed with FLAG and H4 antibodies. Bait protein bands are indicated. **(d)** Electrophoretic mobility shift assays (EMSA) samples were separated on a PAGE gel and stained with Gel Red for visualization. **(e)** Chromatin-bound proteins colocalize with the nuclear marker H4-mCherry in metaphase while free nuclear proteins diffuse into the cytoplasm following the entry into mitosis (*top*). Visualization of bridgin localization by fluorescence microscopy when expressed under the native or

- 1 an Over-expression (OE) promoter construct. Outer kinetochore protein Ndc80 was used to mark the
- 2 kinetochore. **(f)** Visualization of Bgi1-OE constructs. GFP-Bgi1-OE constructs were transformed into
- 3 the H4-mCherry *bgi1Δ* strain. Representative images of cells in G2 and M phase are shown. Scale
- 4 bar, 3  $\mu$ m.

1

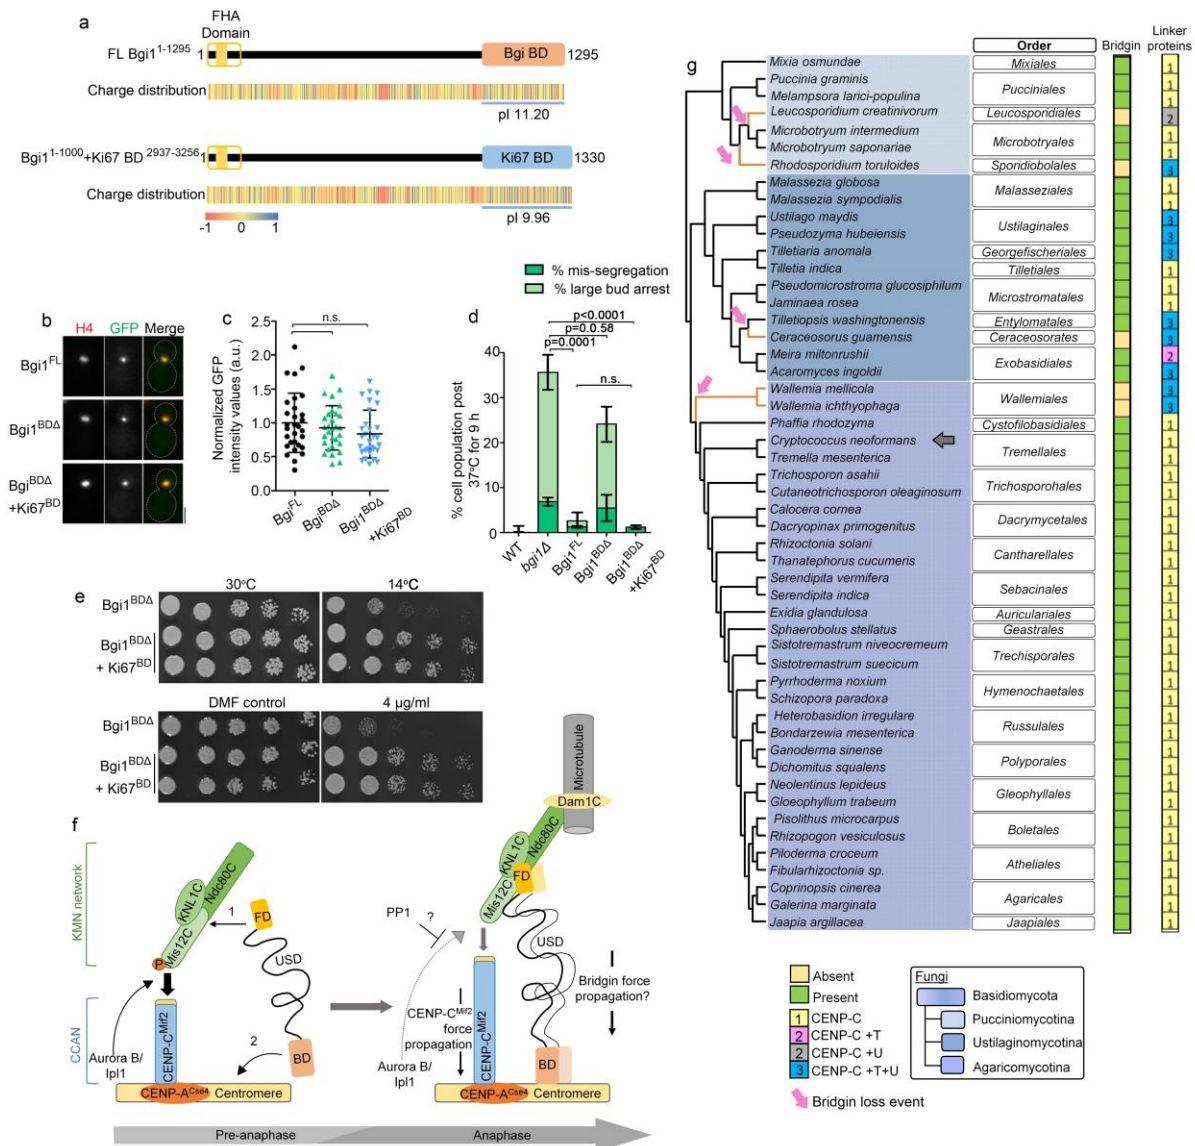

2

3

4 **Figure 6. Bridgin is an unconventional linker of the outer kinetochore and centromeric**  
 5 **chromatin. (a)** Schematic representation of bridgin in which its basic domain aa1005-1295 with a pI  
 6 of 11.2, was replaced with the basic DNA binding domain from HsKi67, aa2937-3256 that exhibits a pI  
 7 of 9.96. **(b)** Representative micrographs of *Bgi1*<sup>FL</sup>, *Bgi1*<sup>BDA</sup> and *Bgi1*<sup>BDA</sup>+*Ki67*<sup>BD</sup>, expressed in *bgi1Δ*  
 8 cells expressing H4-mCherry. **(c)** Quantitation of *Bgi1* and chimeric *Bgi1* signals in 30 cells. Not  
 9 significant (n.s.). *P*-value was determined using two-tailed t-test. Scale bar, 3 μm. **(d)**  
 10 Complementation of *bgi1Δ* phenotype by *Bgi1*<sup>FL</sup>, *Bgi1*<sup>BDA</sup> and *Bgi1*<sup>BDA</sup>+*Ki67*<sup>BD</sup> protein derivatives was  
 11 measured by assessing their phenotype post-incubation of cells to 37°C for 9 h. Error bars, s.d. The  
 12 number of cells examined was >1000, *N*=3 for each indicated strain. *P*-value was determined using  
 13 two-tailed t-test. Not significant (n.s.) **(e)** Cells of varying numbers 2x10<sup>4</sup>, 2x10<sup>3</sup>, 200, 100 and 50 were  
 14 spotted on YPD without TBZ and YPD containing 4 μg/ml TBZ. **(f)** A model describing bridgin as a  
 15 kinetochore protein connecting the outer KMN network, through its FD and USD, and directly to DNA  
 16 via its basic DNA binding domain. Restricted interaction of bridgin with DNA in WT cells is a possible  
 17 consequence of outer kinetochore specific recruitment prior to its interaction with centromeric  
 18 chromatin. Increased bridgin localization is observed in anaphase **(g)** Identification of bridgin  
 19 homologs across Basidiomycota. Presence or absence of a bridgin homologs is represented. No of  
 20 identified linker pathways are mentioned and color-coded to represent the linker pathway(s) present.

- 1 Grey arrow points to *C. neoformans*. Bridgin loss events in basidiomycete lineages are represented
- 2 by orange lines in the cladogram.
- 3
